# Supplementary material for: Outcome of revascularisation in stable coronary artery disease without ischaemia: a Danish registry-based follow-up study
Source: PubMed Central journal article supplement — BMJ Open. 2017 Aug 11;7(8):e016169. doi: 10.1136/bmjopen-2017-016169 (PMC5629720; doi:10.1136/bmjopen-2017-016169), 2017-08-11
Supplement: bmjopen-2017-016169.draft_revisions.pdf [file bmjopen-2017-016169.draft_revisions.pdf]

# BMJ Open

BMJ Open is committed to open peer review. As part of this commitment we make the peer review history of every article we publish publicly available.

When an article is published we post the peer reviewers' comments and the authors' responses online. We also post the versions of the paper that were used during peer review. These are the versions that the peer review comments apply to.

The versions of the paper that follow are the versions that were submitted during the peer review process. They are not the versions of record or the final published versions. They should not be cited or distributed as the published version of this manuscript.

BMJ Open is an open access journal and the full, final, typeset and author-corrected version of record of the manuscript is available on our site with no access controls, subscription charges or pay-per-view fees (<http://bmjopen.bmj.com>).

If you have any questions on BMJ Open's open peer review process please email [info.bmjopen@bmj.com](mailto:info.bmjopen@bmj.com)

# BMJ Open

## Stable coronary artery disease without ischaemia: Can exceptional revascularization be a good choice?

|                                 |                                                                                                                                                                                                                                                                                                                                                                                                                                                                                                                                                                                                                                                                                                                                                                                                                                                                                                                |
|---------------------------------|----------------------------------------------------------------------------------------------------------------------------------------------------------------------------------------------------------------------------------------------------------------------------------------------------------------------------------------------------------------------------------------------------------------------------------------------------------------------------------------------------------------------------------------------------------------------------------------------------------------------------------------------------------------------------------------------------------------------------------------------------------------------------------------------------------------------------------------------------------------------------------------------------------------|
| Journal:                        | <i>BMJ Open</i>                                                                                                                                                                                                                                                                                                                                                                                                                                                                                                                                                                                                                                                                                                                                                                                                                                                                                                |
| Manuscript ID                   | bmjopen-2017-016169                                                                                                                                                                                                                                                                                                                                                                                                                                                                                                                                                                                                                                                                                                                                                                                                                                                                                            |
| Article Type:                   | Research                                                                                                                                                                                                                                                                                                                                                                                                                                                                                                                                                                                                                                                                                                                                                                                                                                                                                                       |
| Date Submitted by the Author:   | 31-Jan-2017                                                                                                                                                                                                                                                                                                                                                                                                                                                                                                                                                                                                                                                                                                                                                                                                                                                                                                    |
| Complete List of Authors:       | Simonsen, Jane; Odense Universitetshospital, Dept. of Nuclear Medicine<br>Mickley, Hans; Odense Universitetshospital, Dept. of Cardiology<br>Johansen, Allan; Odense Universitetshospital, Dept. of Nuclear Medicine<br>Hess, Søren; Odense Universitetshospital, Dept. of Nuclear Medicine<br>Thomassen, Anders; Odense Universitetshospital, Dept. of Nuclear Medicine<br>Gerke, Oke; Odense Universitetshospital, Dept. of Nuclear Medicine;<br>University of Southern Denmark, Centre of Health Economics Research<br>Jensen, Lisette; Odense University Hospital, Department of Cardiology, Catheterization Lab<br>Hallas, Jesper; University of Southern Denmark, Clinical Pharmacology<br>Vach, Werner; University of Freiburg, Clinical Epidemiology, Institute for Medical Biometry and Statistics, Medical Faculty<br>Hoilund-Carlsen, Poul ; Odense Universitetshospital, Dept. of Nuclear Medicine |
| <b>Primary Subject Heading</b>: | Cardiovascular medicine                                                                                                                                                                                                                                                                                                                                                                                                                                                                                                                                                                                                                                                                                                                                                                                                                                                                                        |
| Secondary Subject Heading:      | Diagnostics                                                                                                                                                                                                                                                                                                                                                                                                                                                                                                                                                                                                                                                                                                                                                                                                                                                                                                    |
| Keywords:                       | Ischaemic heart disease < CARDIOLOGY, Myocardial perfusion imaging, Functional ischaemia test, Survival benefit, All-cause death                                                                                                                                                                                                                                                                                                                                                                                                                                                                                                                                                                                                                                                                                                                                                                               |
|                                 |                                                                                                                                                                                                                                                                                                                                                                                                                                                                                                                                                                                                                                                                                                                                                                                                                                                                                                                |

SCHOLARONE™  
Manuscripts

1  
2  
3  
4 **Stable coronary artery disease without ischaemia:**

5  
6 **Can exceptional revascularization be a good choice?**

7  
8  
9  
10 Jane A. Simonsen<sup>1</sup>, Hans Mickley<sup>2</sup>, Allan Johansen<sup>1</sup>, Søren Hess<sup>1</sup>, Anders Thomassen<sup>1</sup>, Oke  
11 Gerke<sup>1,3</sup>, Lisette O. Jensen<sup>2</sup>, Jesper Hallas<sup>4</sup>, Werner Vach<sup>5\*</sup>, Poul F. Hoiland-Carlsen<sup>1\*</sup>

12  
13  
14  
15  
16  
17 <sup>1</sup>Department of Nuclear Medicine, Odense University Hospital, Odense, Denmark,

18  
19 <sup>2</sup>Department of Cardiology, Odense University Hospital, Odense, Denmark, <sup>3</sup>Centre of  
20 Health Economics Research, University of Southern Denmark, Odense, Denmark,

21  
22 <sup>4</sup>Department of Clinical Pharmacology, Institute of Public Health, University of Southern  
23 Denmark, Odense, Denmark, <sup>5</sup>Clinical Epidemiology, Institute for Medical Biometry and  
24 Statistics, Medical Faculty – Medical Center, University of Freiburg, Freiburg, Germany

25  
26  
27  
28  
29  
30  
31 \*Shared last authorship

32  
33  
34  
35 **Address for correspondence:**

36  
37 Jane Angel Simonsen

38  
39 Department of Nuclear Medicine

40  
41 Odense University Hospital

42  
43 DK-5000 Odense C

44  
45 Phone: + 45 6541 2981

46  
47 Fax: + 45 6590 6192

48  
49 Email: [jane.simonsen@rsyd.dk](mailto:jane.simonsen@rsyd.dk)

50  
51  
52  
53  
54  
55 Word count : 2,692

**ABSTRACT**

**Objectives** In stable coronary artery disease (CAD), coronary revascularization may reduce mortality of patients with a certain amount of left ventricular myocardial ischaemia.

However, revascularization does not always follow the guidance suggested by ischaemia testing. We compared outcomes in patients without ischaemia who had either revascularization or medical treatment.

**Design and population** Based on registries, 1,327 consecutive patients with normal myocardial perfusion scintigraphy (MPS) and 278 with fixed perfusion defects were followed for a median of 6.1 years. Most patients received medical therapy alone (**Med**), but 26 (2%) with a normal MPS and 15 (5%) with fixed perfusion defects underwent revascularization (**Revasc**).

**Outcome measures** Incidence rates of all-cause death (ACD) and rates of cardiac death/myocardial infarction (CD/MI).

**Results** With a normal MPS, the ACD rate was 6.2%/year in the **Revasc** group versus 1.9%/year in the **Med** group ( $p=0.01$ ); the CD/MI rates were 6.9%/year and 0.6%/year, respectively ( $p<0.00001$ ). Results persisted after adjustment for predictors of revascularization, in particular angina score, and in comparisons of matched **Revasc** and **Med** patients. With fixed defects, the ACD rate was 9.1%/year in the **Revasc** group and 6.7%/year in the **Med** group ( $p=0.44$ ); the CD/MI rate was 5.0%/year versus 4.2%/year, respectively ( $p=0.69$ ). If adjusted for angiographic variables or analyzed in matched subsets differences remained insignificant.

**Conclusions** With normal MPS, revascularization conferred a higher risk, even after adjustment for predictors of revascularization. With fixed defects, the **Revasc** versus **Med** difference was close to equipoise. Hence, in patients with stable CAD without ischaemia, we could not find evidence to justify exceptional revascularization.

**Strengths and limitations of this study**

- The study was observational, and endpoints were collected from comprehensive national registries
- MPS results were open to referring clinicians
- Rationales for the choice of post-MPS treatment were found in medical records
- Careful adjustment was undertaken in order to achieve a fair comparison of subgroups, and a matching approach was also used
- We focused on hard events.

Peer review only

## INTRODUCTION

In stable angina pectoris patients at low to intermediate risk of coronary artery disease (CAD), it is recommended to use non-invasive testing as a gatekeeper to coronary angiography<sup>1 2</sup>. Myocardial perfusion scintigraphy (MPS) is an ischaemia test that effectively stratifies patients with an intermediate pre-test risk into groups with low or high post-test risk and, hence, identifies potential candidates for coronary revascularization<sup>3-5</sup>. Revascularization is often performed with the intention to improve symptoms or prognosis; however, a survival benefit over optimal medical therapy has not been documented in stable CAD patients<sup>6-8</sup>.

Data from registry-based studies suggest that only in the presence of a certain amount of ischaemia is the prognosis with respect to hard events better with coronary revascularization than with conservative therapy<sup>9 10</sup>. Nevertheless, in daily routine a small proportion of patients with normal MPS or fixed defects still undergoes revascularization. It remains an open question whether this reflects a clinically justified exception to the rule. Addressing this question is a non-trivial task, as a potential inferior prognosis in the revascularized patients may simply reflect a proper clinical selection of high-risk patients with a real need for revascularization, regardless of the MPS result. Comparison of patients with similar risk profiles as regards potential prognostic factors related to the treatment decision might allow for an answer. In an observational design we compared the outcome with and without coronary revascularization in consecutive patients with symptoms of stable CAD but without ischaemia in a setting, where the MPS results were open to the treating physicians.

## MATERIALS AND METHODS

### Study population and design

1  
2  
3  
4 From a consecutive series of 2,157 MPS performed 2002-2007 at Odense University Hospital  
5  
6 for suspected or known CAD in patients who did not participate in a research project, 1,327  
7  
8 patients had normal scintigraphic findings while 278 demonstrated fixed perfusion defects.  
9  
10 Results were analyzed for all patients and for subsets undergoing early revascularization  
11  
12 (**Revasc**) or receiving pure medical therapy (**Med**). Early revascularization was defined as  
13  
14 percutaneous coronary intervention (PCI) or coronary artery bypass grafting (CABG) within  
15  
16 180 days from MPS, while performed >180 days later was termed late revascularization.  
17  
18 Trial design and methods were published previously<sup>11</sup>. The study was approved by the local  
19  
20 data protection committee.  
21  
22  
23  
24  
25

## 26 **MPS**

27  
28  
29  
30 MPS was performed as single photon emission computed tomography (SPECT) with  
31  
32 technetium-99m sestamibi using a standard maximum exercise test or pharmacological stress  
33  
34 by adenosine, dipyridamol, or dobutamine. In the early study period non-gated acquisitions  
35  
36 were used. Later, gated studies were used with at-rest left ventricular ejection fraction  
37  
38 (LVEF) being available in 648 patients (49%) with normal MPS and 147 patients (53%) with  
39  
40 fixed defects. For post-stress LVEF, the numbers were 687 (52%) and 123 (44%),  
41  
42 respectively. Scans were interpreted semi-quantitatively and deemed normal in case of  
43  
44 normal radionuclide distribution throughout the myocardium in the presence also of normalcy  
45  
46 with respect to available non-perfusion markers like wall thickening/motion and LVEF. All  
47  
48 abnormal scans were reviewed by an experienced reader (AJ) blinded to clinical data. Extent  
49  
50 and severity of perfusion defects at stress imaging were converted to percentage myocardium  
51  
52 and categorized as small (5-9% of the myocardium), moderate (10-14%), or large (>14%)<sup>12</sup>.  
53  
54  
55  
56  
57  
58  
59  
60

## Follow-up

History of CAD and medication at the time of MPS were retrieved from medical records and MPS reports. Follow-up ran from the date of the MPS until 31<sup>st</sup> December 2011. Events during follow-up were appointed by means of regional and national registers as previously described<sup>11</sup>. Medical records were examined for treatment decision, and angiographic data were obtained from the Western Denmark Heart Registry comprising records on all coronary angiographies and revascularization procedures performed in Western Denmark, including angina score according to the Canadian Cardiovascular Society (CCS)<sup>13</sup>.

## Statistics

Continuous and categorical variables are shown by means of descriptive statistics and frequency counts including percentages, respectively. Inter-group differences in continuous variables were tested by the Wilcoxon rank-sum test; frequencies were compared by Fisher's exact test or the chi-squared test. Main endpoints were all-cause death (ACD) and cardiac death (defined as death from ischaemic heart disease, congestive heart failure, or malignant arrhythmia) or non-fatal myocardial infarction (CD/MI). Time until event is illustrated with cumulative incidence functions. Cause-specific hazard ratios (CSHR) based on a Cox proportional hazard model as well as subdistribution hazard ratios (SDHR) based on the Fine and Gray regression model<sup>14</sup> were used to assess the difference between **Revasc** and **Med**. The HRs were adjusted for main predictors of revascularization, which were identified by comparison of the two treatment groups and an analysis of the reasons given in the medical records of revascularized patients. Adjustment was performed for one covariate at a time as well as in multivariate models. When considering ACD, late revascularization was regarded as a competing event in order not to bias the natural course. When considering CD/MI, non-



cardiac death and late revascularization were regarded as competing events. Following the general advice to consider all competing events in the statistical analysis<sup>15 16</sup>, we present cumulative incidence functions for all four events but restrict reporting of HRs to the two main endpoints.

Furthermore, a matching approach was used. For each revascularized patient we found a medically treated match with identical or nearly identical values for the variables predictive of revascularization. Event incidences for the revascularized patients and their matches were compared by cumulative incidence curves, CSHRs and SDHRs.

The significance level was set to 5%. Statistical analyses were performed with STATA (©StataCorp LP, Texas, USA). Matching was performed with the 'optmatch' program<sup>17</sup> and incidence rates were compared with the 'stir' command.

## RESULTS

Early revascularization was performed in 26 patients (2%) with normal MPS and in 15 patients (5%) with fixed defects. Characteristics are given in table 1.

**Table 1** Patient characteristics

a) Patients with normal MPS

|                         | All       | Revasc    | Med       | p       |
|-------------------------|-----------|-----------|-----------|---------|
| N                       | 1327      | 26        | 1301      |         |
| Age, years (mean±SD)    | 59.5±11.8 | 62.1±12.2 | 59.5±11.8 | 0.29    |
| Male                    | 574 (43)  | 17 (65)   | 557 (43)  | 0.03    |
| Known CAD               | 248 (19)  | 15 (58)   | 233 (18)  | <0.0001 |
| History                 |           |           |           |         |
| MI                      | 87 (7)    | 6 (23)    | 81 (6)    | 0.005   |
| PCI                     | 149 (11)  | 12 (46)   | 137 (11)  | <0.0001 |
| CABG                    | 59 (4)    | 2 (8)     | 57 (4)    | 0.32    |
| Diabetes mellitus       | 202 (15)  | 5 (19)    | 197 (15)  | 0.58    |
| Medication              |           |           |           |         |
| Aspirin                 | 797 (60)  | 23 (88)   | 774 (59)  | 0.001   |
| Beta blocker            | 462 (35)  | 20 (77)   | 442 (34)  | <0.0001 |
| Calcium channel blocker | 325 (24)  | 9 (35)    | 316 (24)  | 0.25    |
| Nitrates                | 279 (21)  | 8 (31)    | 271 (21)  | 0.23    |

|                               |          |          |          |         |
|-------------------------------|----------|----------|----------|---------|
| Lipid-lowering agents         | 481 (36) | 16 (62)  | 465 (36) | 0.01    |
| LVEF, rest, N                 | 648      | 15       | 633      | 1.00    |
| <30%                          | 0        | 0        | 0        |         |
| 30≤LVEF<50 %                  | 34 (5)   | 0        | 34 (5)   |         |
| ≥50%                          | 614 (95) | 15 (100) | 599 (95) |         |
| LVEF, stress, N               | 687      | 16       | 671      | 0.63    |
| <30%                          | 0        | 0        | 0        |         |
| 30≤LVEF<50%                   | 41 (6)   | 0        | 41 (6)   |         |
| ≥50%                          | 646 (94) | 16 (100) | 630 (94) |         |
| Family history of CAD, N      | 216      | 23       | 193      | 0.83    |
| Positive                      | 113 (52) | 13 (57)  | 100 (52) |         |
| CCS score, N                  | 223      | 26       | 197      | 0.01    |
| 1                             | 122 (55) | 10 (38)  | 112 (57) |         |
| 2                             | 76 (34)  | 8 (31)   | 68 (35)  |         |
| 3                             | 24 (11)  | 8 (31)   | 16 (8)   |         |
| 4                             | 1 (0.4)  | 0        | 1 (0.5)  |         |
| Smoking, N                    | 203      | 22       | 181      | 0.41    |
| Current                       | 56 (28)  | 8 (36)   | 48 (27)  |         |
| Never                         | 79 (39)  | 6 (27)   | 73 (40)  |         |
| Ceased                        | 68 (34)  | 8 (36)   | 60 (33)  |         |
| Number of stenotic vessels, N | 210      | 26       | 184      | <0.0001 |
| 0 vessels                     | 101 (48) | 2 (8)    | 99 (54)  |         |
| 1 vessel                      | 59 (28)  | 10 (38)  | 49 (27)  |         |
| 2 vessels                     | 30 (14)  | 7 (27)   | 23 (13)  |         |
| 3 vessels                     | 20 (10)  | 7 (27)   | 13 (7)   |         |

## b) Patients with fixed perfusion defects

|                          | All       | Revasc    | Med       | p    |
|--------------------------|-----------|-----------|-----------|------|
| N                        | 278       | 15        | 263       |      |
| Age, years (mean±SD)     | 62.5±10.2 | 61.6±11.5 | 62.6±10.1 | 0.63 |
| Male                     | 214 (77)  | 14 (93)   | 200 (76)  | 0.20 |
| Known CAD                | 196 (71)  | 11 (73)   | 185 (70)  | 1.00 |
| History                  |           |           |           |      |
| MI                       | 152 (55)  | 8 (53)    | 144 (55)  | 1.00 |
| PCI                      | 101 (36)  | 6 (40)    | 95 (36)   | 0.79 |
| CABG                     | 76 (27)   | 3 (20)    | 73 (28)   | 0.77 |
| Diabetes mellitus        | 59 (21)   | 5 (33)    | 54 (21)   | 0.33 |
| Medication               |           |           |           |      |
| Aspirin                  | 233 (84)  | 12 (80)   | 221 (84)  | 0.72 |
| Beta blocker             | 177 (64)  | 9 (60)    | 168 (64)  | 0.79 |
| Calcium channel blocker  | 76 (27)   | 6 (40)    | 70 (27)   | 0.25 |
| Nitrates                 | 75 (27)   | 4 (27)    | 71 (27)   | 1.00 |
| Lipid-lowering agents    | 169 (61)  | 8 (53)    | 161 (61)  | 0.59 |
| Size of defects          |           |           |           | 0.62 |
| Small (5-9%)             | 92 (33)   | 4 (27)    | 88 (33)   |      |
| Medium (10-14%)          | 60 (22)   | 2 (13)    | 58 (22)   |      |
| Large (>14%)             | 126 (45)  | 9 (60)    | 117 (45)  |      |
| LVEF, rest, N            | 147       | 4         | 143       | 0.79 |
| <30%                     | 20 (14)   | 0         | 20 (14)   |      |
| 30≤LVEF<50%              | 57 (39)   | 1 (25)    | 56 (39)   |      |
| ≥50%                     | 70 (48)   | 3 (75)    | 67 (47)   |      |
| LVEF, stress, N          | 123       | 5         | 118       | 0.84 |
| <30%                     | 21 (17)   | 0         | 21 (18)   |      |
| 30≤LVEF<50%              | 48 (39)   | 2 (40)    | 46 (39)   |      |
| ≥50%                     | 54 (44)   | 3 (60)    | 51 (43)   |      |
| Family history of CAD, N | 106       | 14        | 92        | 0.77 |
| Positive                 | 45 (42)   | 5 (36)    | 40 (43)   |      |

|                               |         |         |         |       |
|-------------------------------|---------|---------|---------|-------|
| CCS score, N                  | 115     | 15      | 100     | 0.13  |
| 1                             | 73 (63) | 7 (47)  | 66 (66) |       |
| 2                             | 25 (22) | 3 (20)  | 22 (22) |       |
| 3                             | 16 (14) | 5 (33)  | 11 (11) |       |
| 4                             | 1 (1)   | 0       | 1 (1)   |       |
| Smoking, N                    | 102     | 13      | 89      | 1.00  |
| Current                       | 36 (35) | 5 (38)  | 31 (35) |       |
| Never                         | 19 (19) | 2 (15)  | 17 (19) |       |
| Ceased                        | 47 (46) | 6 (46)  | 41 (46) |       |
| Number of stenotic vessels, N | 108     | 15      | 93      | 0.002 |
| 0 vessels                     | 15 (14) | 0       | 15 (16) |       |
| 1 vessel                      | 26 (24) | 3 (20)  | 23 (25) |       |
| 2 vessels                     | 34 (31) | 11 (73) | 23 (25) |       |
| 3 vessels                     | 33 (31) | 1 (7)   | 32 (34) |       |

The decision to revascularize was clearly associated with symptoms and angiographic findings but less with MPS results (table 2). In four cases of normal MPS, revascularization was performed following a new incident independent of the symptoms prompting MPS.

**Table 2** Reasons for revascularization according to medical records

a) Patients with normal MPS

| DM | History       | Angio findings* | CCS score | Time from MPS to revasc. (days) | Type of revasc. | Reasoning to decide for revascularization was based on |
|----|---------------|-----------------|-----------|---------------------------------|-----------------|--------------------------------------------------------|
|    |               | 0-VD            | 3         | 83                              | PCI             | Angio, sympt, EET                                      |
|    | PCI           | 2-VD            | 2         | 72                              | PCI             | Angio, sympt, ECG changes during dobutamine stress     |
| +  |               | 2-VD            | 2         | 159                             | CABG            | Angio, sympt, IVUS                                     |
|    | MI, PCI       | 2-VD            | 2         | 127                             | PCI             | Angio, EET, history of MI                              |
| +  |               | 1-VD            | 1         | 157                             | PCI             | MI, i.e., recurrent event                              |
|    |               | 3-VD            | 3         | 5                               | PCI             | Angio                                                  |
| +  |               | 1-VD            | 3         | 71                              | PCI             | Angio, sympt                                           |
|    | PCI, CABG     | 3-VD            | 1         | 169                             | PCI             | Angio, sympt                                           |
|    |               | 0-VD            | 1         | 49                              | PCI             | Angio, IVUS, EET                                       |
|    |               | 1-VD            | 1         | 93                              | PCI             | MI, i.e., recurrent event                              |
|    |               | 1-VD            | 2         | 149                             | PCI             | Angio, IVUS, sympt                                     |
|    | PCI           | 2-VD            | 1         | 131                             | PCI             | MI, i.e., recurrent event                              |
|    | PCI           | 1-VD            | 1         | 116                             | PCI             | Angio, sympt                                           |
| +  | MI, PCI       | 3-VD            | 3         | 43                              | PCI             | Angio, sympt                                           |
|    |               | 1-VD            | 3         | 170                             | CABG            | Angio, IVUS, persistent sympt                          |
|    |               | 1-VD            | 2         | 43                              | PCI             | Angio, persistent sympt                                |
|    |               | 1-VD            | 1         | 145                             | PCI             | Angio, sympt                                           |
|    | MI, PCI       | 3-VD            | 3         | 95                              | PCI             | Angio, sympt                                           |
| +  | MI, PCI       | 2-VD            | 2         | 104                             | PCI             | Angio, sympt                                           |
|    | MI, PCI       | 3-VD            | 3         | 104                             | CABG            | Angio, sympt                                           |
|    | PCI           | 1-VD            | 3         | 37                              | PCI             | Angio, sympt                                           |
|    | MI, PCI, CABG | 3-VD            | 1         | 16                              | PCI             | MI, i.e., recurrent event                              |
|    | PCI           | 3-VD            | 1         | 43                              | PCI             | Angio, sympt                                           |
|    |               | 1-VD            | 2         | 76                              | PCI             | Angio, sympt                                           |
|    |               | 2-VD            | 1         | 49                              | PCI             | Angio, sympt                                           |



|                              |          |         |          |         |          |        |          |      |
|------------------------------|----------|---------|----------|---------|----------|--------|----------|------|
| Any event (death/MI/revasc.) | 248 (19) | 12 (46) | 236 (18) |         | 138 (50) | 8 (53) | 130 (49) |      |
| Death                        | 157 (12) | 7 (27)  | 150 (12) | 0.03    | 95 (34)  | 7 (47) | 88 (33)  | 0.40 |
| Cardiac death                | 16 (1)   | 2 (8)   | 14 (1)   | 0.04    | 38 (14)  | 3 (20) | 35 (13)  | 0.44 |
| MI                           | 43 (3)   | 5 (19)  | 38 (3)   | 0.001   | 27 (10)  | 1 (7)  | 26 (10)  | 1.00 |
| MI or death                  | 191 (14) | 10 (38) | 181 (14) | 0.002   | 111 (40) | 8 (53) | 103 (39) | 0.29 |
| MI or cardiac death          | 57 (4)   | 7 (27)  | 50 (4)   | <0.0001 | 58 (21)  | 4 (27) | 54 (21)  | 0.53 |
| PCI                          | 81 (6)   | 1 (4)   | 80 (6)   | 1.00    | 48 (17)  | 1 (7)  | 47 (18)  | 0.48 |
| CABG                         | 15 (1)   | 2 (8)   | 13 (1)   | 0.03    | 6 (2)    | 0      | 6 (2)    | 1.00 |
| PCI/CABG                     | 92 (7)   | 3 (12)  | 89 (7)   | 0.42    | 50 (18)  | 1 (7)  | 49 (19)  | 0.49 |
| MI/cardiac death/revasc.     | 124 (9)  | 9 (35)  | 115 (9)  | <0.0001 | 87 (31)  | 4 (27) | 83 (32)  | 0.78 |

Cumulative incidence functions shown in figure 1 indicated no difference in the incidence of non-cardiac deaths between the two treatment groups for neither patients with normal MPS, nor patients with fixed defects. As regards late revascularization, the **Med** curve tended to run above the **Revasc** curve in case of fixed defects; however, the difference was not significant. With normal MPS, substantially different incidence rates of the main endpoints could be observed. The ACD rate was 6.2%/year in the **Revasc** group compared with 1.9%/year in the **Med** group ( $p=0.01$ ) and the CD/MI rate was 6.9%/year versus 0.6%/year, respectively ( $p<0.00001$ ). In case of fixed defects there were no significant inter-group differences, and **Revasc/Med** ratios were similar for both endpoints: The ACD rate was 9.1%/year in the **Revasc** group and 6.7%/year in the **Med** group ( $p=0.44$ ) and the CD/MI rate was 5.0%/year versus 4.2%/year, respectively ( $p=0.69$ ).

### Quantification of effects and adjustment

Judged from tables 1 and 2, variables CAD, previous MI, previous PCI, CCS score, and number of stenotic coronary arteries were associated with the decision to revascularize despite normal MPS. The use of aspirin, beta blockers, and lipid lowering agents was unequally distributed and, hence, could be a surrogate for a disease state also predictive of revascularization. Gender was also unevenly distributed and, therefore, considered in the

models. In patients with fixed effects, the only significant association found was for the number of stenotic arteries. The lack of significance for the other variables may, however, mainly reflect lack of power due to the small number of revascularized patients. It seems reasonable to assume that variables predictive of the treatment decision in patients with normal MPS would also be potential predictors in patients with fixed effects. Hence, we used the same list of (potential) predictors.

Unadjusted and adjusted CSHRs and SDHRs comparing the **Revasc** and **Med** groups are shown in table 4. Adjustment for clinical and/or angiographic variables did not change the HRs with normal MPS, which were always in the magnitude of 3-5 for ACD and >9 for CD/MI, all being significantly different from 1. With fixed defects, the HR was never significantly different from 1. Adjusted for clinical variables, the HRs for both outcomes stayed in the magnitude of 1.2 to 1.8. However, with adjustment for angiographic variables the HR changed more substantially to values around 2 for ACD and between 0.7 and 0.9 for CD/MI.

**Table 4** Cause-specific hazard ratios and subdistribution hazard ratios of the **Revasc** versus **Med** difference

a) Patients with normal MPS

|                                                                           | ACD  |         |      |       | CD/MI |         |       |         |
|---------------------------------------------------------------------------|------|---------|------|-------|-------|---------|-------|---------|
|                                                                           | CSHR | p       | SDHR | p     | CSHR  | p       | SDHR  | p       |
| Univariate analysis                                                       | 3.85 | 0.001   | 3.42 | 0.002 | 15.44 | <0.0001 | 14.09 | <0.0001 |
| <b>Adjusted for clinical variables</b>                                    |      |         |      |       |       |         |       |         |
| Age                                                                       | 3.22 | 0.003   | 3.12 | 0.005 | 12.93 | <0.0001 | 11.75 | <0.0001 |
| Gender                                                                    | 3.58 | 0.001   | 3.17 | 0.003 | 15.11 | <0.0001 | 13.85 | <0.0001 |
| Age, gender                                                               | 2.89 | 0.007   | 2.80 | 0.01  | 12.37 | <0.0001 | 11.26 | <0.0001 |
| DM                                                                        | 3.81 | 0.001   | 3.39 | 0.002 | 15.30 | <0.0001 | 13.99 | <0.0001 |
| Known CAD                                                                 | 3.76 | 0.001   | 3.47 | 0.002 | 13.04 | <0.0001 | 12.29 | <0.0001 |
| Previous MI                                                               | 3.97 | <0.0001 | 3.52 | 0.002 | 12.76 | <0.0001 | 12.01 | <0.0001 |
| Previous PCI                                                              | 4.27 | <0.0001 | 3.87 | 0.001 | 14.42 | <0.0001 | 13.45 | <0.0001 |
| CAD category*                                                             | 3.71 | 0.001   | 3.45 | 0.003 | 13.02 | <0.0001 | 12.26 | <0.0001 |
| CAD category*, previous MI                                                | 3.68 | 0.001   | 3.42 | 0.004 | 12.87 | <0.0001 | 12.48 | <0.0001 |
| CAD category*, previous MI, aspirin, beta blocker, lipid lowering         | 4.22 | <0.0001 | 3.81 | 0.001 | 11.86 | <0.0001 | 11.43 | <0.0001 |
| Gender, CAD category*, previous MI, aspirin, beta blocker, lipid lowering | 4.08 | 0.001   | 3.66 | 0.002 | 11.76 | <0.0001 | 11.34 | <0.0001 |
| <b>Adjusted for angiographic variables</b>                                |      |         |      |       |       |         |       |         |
| CCS score (N=223/115)                                                     | 4.27 | 0.003   | 3.77 | 0.006 | 12.06 | <0.0001 | 11.03 | <0.0001 |
| Number of stenotic vessels (N=210/108)                                    | 4.62 | 0.005   | 4.52 | 0.006 | 9.19  | 0.001   | 9.28  | 0.001   |
| CCS score, number of stenotic vessels (N=210/108)                         | 4.52 | 0.007   | 4.18 | 0.007 | 9.89  | 0.001   | 9.49  | 0.002   |

| <b>Adjusted for scintigraphic variables</b>                                                                                  |      |       |      |       |       |         |       |         |  |
|------------------------------------------------------------------------------------------------------------------------------|------|-------|------|-------|-------|---------|-------|---------|--|
| At-rest LVEF (N=648/147)                                                                                                     | 2.87 | 0.08  | 2.97 | 0.08  | 12.78 | <0.0001 | 12.86 | <0.0001 |  |
| Post-stress LVEF (N=687/123)                                                                                                 | 2.70 | 0.09  | 2.80 | 0.10  | 12.74 | <0.0001 | 12.93 | <0.0001 |  |
| <b>Adjusted for selected variables of all types</b>                                                                          |      |       |      |       |       |         |       |         |  |
| Gender, CAD category*, previous MI, aspirin, beta blocker, lipid lowering, CCS score (N=223/115)                             | 4.55 | 0.004 | 3.48 | 0.009 | 29.29 | <0.0001 | 26.69 | <0.0001 |  |
| Gender, CAD category*, previous MI, aspirin, beta blocker, lipid lowering, number of stenotic vessels (N=210/108)            | 4.30 | 0.02  | 3.79 | 0.03  | 11.70 | 0.001   | 11.80 | 0.001   |  |
| Gender, CAD category*, previous MI, aspirin, beta blocker, lipid lowering, CCS score, number of stenotic vessels (N=210/108) | 4.14 | 0.02  | 3.31 | 0.06  | 20.86 | 0.001   | 20.23 | 0.001   |  |
| b) Patients with fixed perfusion defects                                                                                     |      |       |      |       |       |         |       |         |  |
|                                                                                                                              |      |       |      |       |       |         |       |         |  |
| ACD                                                                                                                          |      |       |      |       | CD/MI |         |       |         |  |
|                                                                                                                              | CSHR | p     | SDHR | p     | CSHR  | p       | SDHR  | p       |  |
| Univariate analysis                                                                                                          | 1.49 | 0.31  | 1.68 | 0.18  | 1.24  | 0.72    | 1.29  | 0.66    |  |
| <b>Adjusted for clinical variables</b>                                                                                       |      |       |      |       |       |         |       |         |  |
| Age                                                                                                                          | 1.50 | 0.30  | 1.75 | 0.16  | 1.26  | 0.70    | 1.28  | 0.67    |  |
| Gender                                                                                                                       | 1.41 | 0.39  | 1.60 | 0.22  | 1.22  | 0.74    | 1.30  | 0.66    |  |
| Age, gender                                                                                                                  | 1.44 | 0.36  | 1.69 | 0.19  | 1.26  | 0.71    | 1.30  | 0.66    |  |
| DM                                                                                                                           | 1.42 | 0.39  | 1.63 | 0.23  | 1.19  | 0.78    | 1.26  | 0.40    |  |
| Known CAD                                                                                                                    | 1.49 | 0.31  | 1.68 | 0.17  | 1.20  | 0.76    | 1.28  | 0.67    |  |
| Previous MI                                                                                                                  | 1.50 | 0.31  | 1.69 | 0.17  | 1.24  | 0.72    | 1.29  | 0.66    |  |
| Previous PCI                                                                                                                 | 1.52 | 0.29  | 1.70 | 0.16  | 1.26  | 0.70    | 1.29  | 0.65    |  |
| CAD category*                                                                                                                | 1.55 | 0.27  | 1.76 | 0.15  | 1.28  | 0.68    | 1.31  | 0.64    |  |
| CAD category*, previous MI                                                                                                   | 1.56 | 0.26  | 1.77 | 0.14  | 1.29  | 0.67    | 1.32  | 0.64    |  |
| CAD category*, previous MI, aspirin, beta blocker, lipid lowering                                                            | 1.39 | 0.41  | 1.58 | 0.25  | 1.28  | 0.69    | 1.31  | 0.66    |  |
| Gender, CAD category*, previous MI, aspirin, beta blocker, lipid lowering                                                    | 1.34 | 0.47  | 1.51 | 0.30  | 1.27  | 0.69    | 1.32  | 0.65    |  |
| <b>Adjusted for angiographic variables</b>                                                                                   |      |       |      |       |       |         |       |         |  |
| CCS score (N=223/115)                                                                                                        | 1.61 | 0.27  | 1.93 | 0.09  | 0.82  | 0.75    | 0.87  | 0.80    |  |
| Number of stenotic vessels (N=210/108)                                                                                       | 2.35 | 0.09  | 2.67 | 0.06  | 0.74  | 0.65    | 0.77  | 0.69    |  |
| CCS score, number of stenotic vessels (N=210/108)                                                                            | 1.76 | 0.28  | 2.27 | 0.07  | 0.64  | 0.51    | 0.73  | 0.58    |  |
| <b>Adjusted for scintigraphic variables</b>                                                                                  |      |       |      |       |       |         |       |         |  |
| At-rest LVEF (N=648/147)                                                                                                     | 0.85 | 0.87  | 1.00 | 1.00  | -\$   | -\$     | -\$   | -\$     |  |
| Post-stress LVEF (N=687/123)                                                                                                 | 0.59 | 0.61  | 0.72 | 0.73  | -\$   | -\$     | -\$   | -\$     |  |
| Size of defects                                                                                                              | 1.23 | 0.61  | 1.38 | 0.43  | 1.00  | 1.00    | 1.08  | 0.90    |  |
| <b>Adjusted for selected variables of all types</b>                                                                          |      |       |      |       |       |         |       |         |  |
| Gender, CAD category*, previous MI, aspirin, beta blocker, lipid lowering, CCS score (N=223/115)                             | 1.54 | 0.38  | 1.99 | 0.13  | 0.89  | 0.86    | 0.94  | 0.93    |  |
| Gender, CAD category*, previous MI, aspirin, beta blocker, lipid lowering, number of stenotic vessels (N=210/108)            | 3.68 | 0.06  | 4.31 | 0.10  | 0.90  | 0.90    | 0.85  | 0.89    |  |
| Gender, CAD category*                                                                                                        | 3.05 | 0.11  | 4.37 | 0.07  | 0.84  | 0.83    | 0.92  | 0.94    |  |

1  
2 previous MI, aspirin, beta  
3 blocker,  
4 lipid lowering, CCS score,  
5 number of stenotic vessels  
6 (N=210/108)

---

7 \*In order to reduce the number of covariates, and because of correlation between CAD and previous revascularization, a CAD category  
8 variable was generated, taking into account the history of both CAD and previous revascularization: 1 = suspected CAD; 2 = known CAD  
9 with no previous revascularization; 3 = known CAD with previous revascularization  
§Fitting of Cox-model indicated complete separation; hence, no results could be presented

10  
11 Scintigraphic variables, available only in a subgroup of all patients, were also to  
12  
13 some degree associated with treatment decisions. All the **Revasc** patients with normal MPS  
14 had LVEF  $\geq 50\%$ , whereas some of the **Med** patients had  $30 \leq \text{LVEF} < 50\%$ , cf. table 1a.  
15  
16 Adjustment for LVEF category slightly reduced the HRs for ACD but not for CD/MI (table  
17  
18 4a). One out of four of the **Revasc** patients with fixed defects had a moderately reduced at-  
19 rest LVEF ( $30 \leq \text{LVEF} < 50\%$ ), but no one had a severely reduced LVEF ( $< 30\%$ ), which was  
20 the case in 14% of the **Med** patients (table 1b). Adjustment for LVEF category reduced the  
21 HRs for ACD, whereas for CD/MI, numbers were too small for an estimation. Similarly, in  
22 spite of no significant inter-group difference in size of perfusion defects, adjustment for  
23 defect size slightly reduced the HR for both endpoints (table 4b).  
24  
25  
26  
27  
28  
29  
30  
31  
32  
33

34 For matched subsets, results were similar to those from the entire groups; in  
35 case of normal MPS the CSHR was 7.97 ( $p=0.05$ ) for ACD, 4.12 ( $p=0.08$ ) for CD/MI. With  
36 fixed defects, the CSHR was 1.00 ( $p=1.00$ ) for ACD and 0.70 ( $p=0.67$ ) for CD/MI,  
37 respectively. Cumulative incidence functions resembled those for the entire groups. Detailed  
38 results are given in the Supplementary material.  
39  
40  
41  
42  
43  
44  
45  
46

## 47 DISCUSSION

48  
49  
50  
51 In this study, 2% of patients with normal MPS and 5% with fixed perfusion defects  
52 underwent early coronary revascularization; i.e., exceptional revascularization. With normal  
53 MPS, **Revasc** patients had significantly higher event rates than **Med** patients. With fixed  
54 defects, no significant inter-group differences were observed. Results persisted after  
55  
56  
57  
58  
59  
60



1 adjustment for predictors of revascularization as well as after matching. Noteworthy, MPS  
2 was conducted as a part of the routine diagnostic work-up and results were open to the  
3 referring clinicians. Still, revascularization was undertaken in some patients, probably  
4 primarily based on angiographic and clinical findings.  
5  
6  
7  
8  
9

### 10 11 12 13 **The use of MPS**

14  
15  
16  
17 In patients with stable angina, an ischaemia test is far from always performed before  
18 angiography<sup>18 19</sup>. An anatomical approach to the CAD diagnosis and quantification typically  
19 leads to more revascularization procedures than a functional approach<sup>20-22</sup>. However,  
20 strategies involving MPS have a greater prognostic power than those without functional  
21 testing<sup>23 24</sup>.  
22  
23  
24  
25  
26  
27

28 Optimal risk stratification derives from the ability of a normal MPS to identify  
29 patients at exceedingly low risk, and that of an abnormal scan to identify patients at greater  
30 risk, thus rendering a number of catheterization and invasive interventions superfluous<sup>25-27</sup>.  
31 Following a normal MPS, the annual death rate is generally <2% and the annual rate of hard  
32 cardiac events <1%, a little higher in risk groups<sup>28 29</sup>. We and others previously found a  
33 general warranty period following a normal MPS of 5 years<sup>11 30</sup>. Thus, under usual  
34 conditions, cardiac catheterization is not warranted in the presence of a normal study, unless  
35 there is a change in symptoms.  
36  
37  
38  
39  
40  
41  
42  
43  
44  
45

46 A small percentage of patients with normal scans do have events within the  
47 warranty period. In our population of 1,327 patients with normal MPS, four patients (0.3%)  
48 underwent revascularization within 6 months from MPS because of an acute MI. One had  
49 diabetes, one had chronic kidney disease, and two had known CAD. This supports previous  
50 findings of a poorer prognosis for high-risk subgroups and underscores the additional  
51 prognostic value of clinical findings to MPS results. It also illustrates the fact that MI – more  
52  
53  
54  
55  
56  
57  
58  
59  
60

1 than death – is hard to anticipate<sup>31</sup>. MIs can break out in vessels with a normal appearance<sup>32</sup>  
2  
3  
4<sup>33</sup>, whereas stenotic and occluded arteries often come with collaterals, preventing MI or at  
5  
6 least limiting its size<sup>34</sup>. Hence, although the occurrence of MI is associated with the presence  
7  
8 of atherosclerosis, it may not be correlated to its severity, and therefore, MPS – like other  
9  
10 imaging techniques – cannot predict specific lesions but patients at risk<sup>35 36</sup>.

11  
12  
13 Left ventricular function in the shape of LVEF has an independent prognostic  
14  
15 and predictive value<sup>3 10</sup>. However, decision to perform revascularization in our patients was  
16  
17 in general not based on the presence of a reduced LVEF as all **Revasc** patients with normal  
18  
19 MPS had preserved LVEFs, and far from all patients with a LVEF below 50% underwent  
20  
21 revascularization.  
22

23  
24 Dominant MPS parameters driving subsequent resource utilization are extent  
25  
26 and severity of reversible perfusion defects<sup>12</sup>. In addition, a variety of clinical elements, most  
27  
28 importantly anginal symptoms, further influence referral rates<sup>20</sup>. Thus, when patients with  
29  
30 normal scans or scans showing only mild ischaemia are referred to angiography, this is  
31  
32 typically based on clinical symptoms<sup>37</sup>. In former reports from the US, 3% of patients without  
33  
34 ischaemia were referred to angiography, and revascularization was performed in one fifth of  
35  
36 these<sup>38-40</sup>. The numbers in our series were higher.  
37  
38  
39  
40  
41

### 42 **Strengths and limitations**

43  
44  
45  
46 Contrary to previous reports on post-MPS assignment in which the authors were left to  
47  
48 speculate on possible reasons for paradoxical treatments<sup>20</sup>, we went through medical records  
49  
50 describing rationales for the choice of treatment, well aware that it is difficult to find specific  
51  
52 information on the reason for a clinical decision in retrospect. Careful adjustment was  
53  
54 undertaken in order to achieve a fair comparison of subgroups.  
55  
56  
57  
58  
59  
60

1 Subsets treated exceptionally, given the MPS findings, constituted a minority of  
2  
3 our patients. Considering the small number of **Revasc** patients compared to **Med** patients it  
4 was not equitable to estimate a propensity score. However, results from Cox models adjusted  
5 for individual covariates are comparable to results from propensity score-adjusted Cox  
6 models<sup>41</sup>. Adjustment for different predictors of revascularization did not change our results;  
7 specifically, differences persisted after adjustment for angina score, one of the most important  
8 predictors of revascularization. In addition, results of the matching approach were  
9 comparable to those from Cox modelling, i.e., effects observed in univariate analyses did not  
10 vanish. An indicator of an even distribution of non-cardiac health problems affecting  
11 prognosis as well as treatment decision was the fact that in none of the subgroups of our  
12 patients did we observe a significant difference between the CD/ACD ratios.  
13  
14  
15  
16  
17  
18  
19  
20  
21  
22  
23  
24  
25

26 In analyzing outcome, we focused on hard events. Just like observational  
27 studies have indicated that at least 10% of the left ventricular myocardium should be  
28 ischaemic in order for the patient to gain a survival benefit<sup>42-44</sup>, the same amount seems to be  
29 a prerequisite of an improvement in symptoms and exercise capacity<sup>45 46</sup>. Hence,  
30 revascularization is unlikely to benefit stable CAD patients unless there is objective evidence  
31 of ischaemia.  
32  
33  
34  
35  
36  
37  
38  
39  
40  
41  
42  
43

## 44 CONCLUSIONS

45  
46  
47  
48 In our consecutive series of patients undergoing MPS for stable angina pectoris in the  
49 clinical routine, 2% of those with normal MPS and 5% of those with fixed perfusion defects  
50 underwent revascularization, contrary to established rules. With normal MPS, **Revasc** was  
51 associated with significantly more cardiac events and shorter survival than **Med**, even after  
52 adjustment for clinical, angiographic, and scintigraphic variables. With fixed defects, there  
53  
54  
55  
56  
57  
58  
59  
60

1 were no significant differences. Thus, our findings could not justify deviations from the rule  
2  
3  
4 to avoid coronary revascularization in the absence of myocardial ischemia in stable angina  
5  
6 pectoris patients.  
7  
8  
9  
10

## 11 12 13 **ACKNOWLEDGMENTS**

14  
15  
16  
17 Thanks to Statistician Sonja Wehberg for assistance with computations.  
18  
19  
20  
21  
22

## 23 24 **COMPETING INTERESTS**

25  
26  
27  
28 The authors declare that they have no conflict of interest.  
29  
30  
31  
32  
33  
34

## 35 36 **FUNDING**

37 This work was part of a PhD project. The first author received a PhD scholarship from The  
38  
39 PhD Research Fund at Odense University Hospital, Odense, Denmark.  
40  
41  
42  
43  
44  
45

## 46 47 **DATA SHARING STATEMENT**

48  
49  
50 There are no unpublished data from this study.  
51  
52  
53  
54  
55  
56

## 57 58 **CONTRIBUTORSHIP STATEMENT**

59  
60

1  
2  
3  
4 There are ten authors. The corresponding author is Jane Angel Simonsen.  
5

6 Poul Flemming Hoiland-Carlsen, Jane Angel Simonsen, Allan Johansen, Oke  
7 Gerke, Anders Thomassen, Søren Hess, Hans Mickley, and Werner Vach contributed to the  
8 conception and design. Jane Angel Simonsen, Werner Vach, Oke Gerke, Poul Flemming  
9 Hoiland-Carlsen, Lisette Okkels Jensen, and Jesper Hallas were involved in data analysis.  
10 All authors were actively involved in collecting and interpreting data, in drafting or revising  
11 of the manuscript, and all read and approved the final manuscript submitted. Professor  
12 Werner Vach was the driving force in applying the statistical analyses as Professor Poul  
13 Flemming Hoiland-Carlsen was in most aspects of nuclear cardiologic imaging. Therefore,  
14 we propose that these two share the last authorship.  
15  
16  
17  
18  
19  
20  
21  
22  
23  
24  
25  
26  
27  
28  
29  
30  
31  
32  
33  
34  
35  
36  
37  
38  
39  
40  
41  
42  
43  
44  
45  
46  
47  
48  
49  
50  
51  
52  
53  
54  
55  
56  
57  
58  
59  
60

1  
2  
3  
4  
5  
6  
7  
8  
9  
10  
11  
12  
13  
14  
15  
16  
17  
18  
19  
20  
21  
22  
23  
24  
25  
26  
27  
28  
29  
30  
31  
32  
33  
34  
35  
36  
37  
38  
39  
40  
41  
42  
43  
44  
45  
46  
47  
48  
49  
50  
51  
52  
53  
54  
55  
56  
57  
58  
59  
60  
**REFERENCE LIST**

1. Montalescot G, Sechtem U, Achenbach S, *et al.* 2013 ESC guidelines on the management of stable coronary artery disease: the Task Force on the management of stable coronary artery disease of the European Society of Cardiology. *Eur Heart J* 2013;**34**:2949-3003. doi: 10.1093/eurheartj/ehs296 [published Online First: 2013/09/03]
2. Fihn SD, Gardin JM, Abrams J, *et al.* 2012 ACCF/AHA/ACP/AATS/PCNA/SCAI/STS guideline for the diagnosis and management of patients with stable ischemic heart disease: a report of the American College of Cardiology Foundation/American Heart Association task force on practice guidelines, and the American College of Physicians, American Association for Thoracic Surgery, Preventive Cardiovascular Nurses Association, Society for Cardiovascular Angiography and Interventions, and Society of Thoracic Surgeons. *Circulation* 2012;**126**:e354-e471.
3. Bourque JM, Beller GA. Stress myocardial perfusion imaging for assessing prognosis: an update. *JACC Cardiovasc Imaging* 2011;**4**:1305-19.
4. Cremer P, Hachamovitch R, Tamarappoo B. Clinical decision making with myocardial perfusion imaging in patients with known or suspected coronary artery disease. *Semin Nucl Med* 2014;**44**:320-29.
5. Hachamovitch R. Does ischemia burden in stable coronary artery disease effectively identify revascularization candidates? Ischemia burden in stable coronary artery disease effectively identifies revascularization candidates. *Circ Cardiovasc Imaging* 2015;**8**:discussion p 8. doi: 10.1161/circimaging.113.000352 [published Online First: 2015/05/16]
6. Pursnani S, Korley F, Gopaul R, *et al.* Percutaneous coronary intervention versus optimal medical therapy in stable coronary artery disease: a systematic review and meta-analysis of randomized clinical trials. *Circ Cardiovasc Interv* 2012;**5**:476-90.
7. Phillips LM, Hachamovitch R, Berman DS, *et al.* Lessons learned from MPI and physiologic testing in randomized trials of stable ischemic heart disease: COURAGE, BARI 2D, FAME, and ISCHEMIA. *J Nucl Cardiol* 2013;**20**:969-75.
8. Songco AV, Brener SJ. Initial strategy of revascularization versus optimal medical therapy for improving outcomes in ischemic heart disease: a review of the literature. *Curr Cardiol Rep* 2012;**14**:397-407.
9. Iwasaki K. Myocardial ischemia is a key factor in the management of stable coronary artery disease. *World J Cardiol* 2014;**6**:130-9. doi: 10.4330/wjc.v6.i4.130 [published Online First: 2014/04/29]
10. Simonsen JA, Johansen A, Gerke O, *et al.* Outcome with invasive versus medical treatment of stable coronary artery disease: influence of perfusion defect size, ischaemia, and ejection fraction. *EuroIntervention* 2016;**11**:1118-24. doi: 10.4244/eijv11i10a226 [published Online First: 2016/02/22]

- 1  
2  
3  
4  
5  
6  
7  
8  
9  
10  
11  
12  
13  
14  
15  
16  
17  
18  
19  
20  
21  
22  
23  
24  
25  
26  
27  
28  
29  
30  
31  
32  
33  
34  
35  
36  
37  
38  
39  
40  
41  
42  
43  
44  
45  
46  
47  
48  
49  
50  
51  
52  
53  
54  
55  
56  
57  
58  
59  
60
11. Simonsen JA, Gerke O, Rask CK, *et al.* Prognosis in patients with suspected or known ischemic heart disease and normal myocardial perfusion: Long-term outcome and temporal risk variations. *J Nucl Cardiol* 2013;**20**:347-57.
  12. Hachamovitch R, Hayes SW, Friedman JD, *et al.* Is there a referral bias against catheterization of patients with reduced left ventricular ejection fraction? Influence of ejection fraction and inducible ischemia on post-single-photon emission computed tomography management of patients without a history of coronary artery disease. *J Am Coll Cardiol* 2003;**42**:1286-94.
  13. Jensen LO, Maeng M, Kaltoft A, *et al.* Stent thrombosis, myocardial infarction, and death after drug-eluting and bare-metal stent coronary interventions. *J Am Coll Cardiol* 2007;**50**:463-70.
  14. Fine JP, Gray RJ. A proportional hazards model for the subdistribution of a competing risk. *J Am Stat Assoc* 1999;**94**:496-509.
  15. Koller MT, Raatz H, Steyerberg EW, *et al.* Competing risks and the clinical community: irrelevance or ignorance? *Stat Med* 2012;**31**:1089-97. doi: 10.1002/sim.4384 [published Online First: 2011/09/29]
  16. Latouche A, Allignol A, Beyersmann J, *et al.* A competing risks analysis should report results on all cause-specific hazards and cumulative incidence functions. *J Clin Epidemiol* 2013;**66**:648-53. doi: 10.1016/j.jclinepi.2012.09.017 [published Online First: 2013/02/19]
  17. Lunt M. Stata programs developed by Mark Lunt [Available from: <http://personalpages.manchester.ac.uk/staff/Mark.Lunt/stata.html>]. Accessed 17 January 2017
  18. Gershlick AH, de BM, Chambers J, *et al.* Role of non-invasive imaging in the management of coronary artery disease: an assessment of likely change over the next 10 years. A report from the British Cardiovascular Society Working Group. *Heart* 2007;**93**:423-31.
  19. Lin GA, Dudley RA, Lucas FL, *et al.* Frequency of stress testing to document ischemia prior to elective percutaneous coronary intervention. *JAMA* 2008;**300**:1765-73.
  20. Hachamovitch R, Nutter B, Hlatky MA, *et al.* Patient management after noninvasive cardiac imaging. Results from SPARC (Study of myocardial perfusion and coronary anatomy imaging roles in coronary artery disease). *J Am Coll Cardiol* 2012;**59**:462-74.
  21. Xiu J, Chen G, Zheng H, *et al.* Comparing treatment outcomes of fractional flow reserve-guided and angiography-guided percutaneous coronary intervention in patients with multi-vessel coronary artery diseases: a systematic review and meta-analysis. *Clin Invest Med* 2016;**39**:E25-36. [published Online First: 2016/02/03]
  22. Shreibati JB, Baker LC, Hlatky MA. Association of coronary CT angiography or stress testing with subsequent utilization and spending among Medicare beneficiaries. *JAMA* 2011;**306**:2128-36.



- 1  
2  
3  
4  
5  
6  
7  
8  
9  
10  
11  
12  
13  
14  
15  
16  
17  
18  
19  
20  
21  
22  
23  
24  
25  
26  
27  
28  
29  
30  
31  
32  
33  
34  
35  
36  
37  
38  
39  
40  
41  
42  
43  
44  
45  
46  
47  
48  
49  
50  
51  
52  
53  
54  
55  
56  
57  
58  
59  
60
23. Gimelli A, Rossi G, Landi P, *et al.* Stress/Rest Myocardial Perfusion Abnormalities by Gated SPECT: Still the Best Predictor of Cardiac Events in Stable Ischemic Heart Disease. *J Nucl Med* 2009;**50**:546-53.
24. Mowatt G, Brazzelli M, Gemmell H, *et al.* Systematic review of the prognostic effectiveness of SPECT myocardial perfusion scintigraphy in patients with suspected or known coronary artery disease and following myocardial infarction. *Nucl Med Commun* 2005;**26**:217-29.
25. Hoilund-Carlsen PF, Johansen A, Christensen HW, *et al.* Potential impact of myocardial perfusion scintigraphy as gatekeeper for invasive examination and treatment in patients with stable angina pectoris: observational study without post-test referral bias. *Eur Heart J* 2006;**27**:29-34.
26. Metz LD, Beattie M, Hom R, *et al.* The prognostic value of normal exercise myocardial perfusion imaging and exercise echocardiography: a meta-analysis. *J Am Coll Cardiol* 2007;**49**:227-37.
27. Bom MJ, Manders JM, Uijlings R, *et al.* Negative predictive value of SPECT for the occurrence of MACE in a medium-sized clinic in the Netherlands. *Neth Heart J* 2014;**22**:151-7. doi: 10.1007/s12471-014-0524-1 [published Online First: 2014/02/28]
28. Supariwala A, Uretsky S, Singh P, *et al.* Synergistic effect of coronary artery disease risk factors on long-term survival in patients with normal exercise SPECT studies. *J Nucl Cardiol* 2011;**18**:207-14.
29. Schinkel AF, Boiten HJ, van der Sijde JN, *et al.* 15-Year outcome after normal exercise (99m)Tc-sestamibi myocardial perfusion imaging: What is the duration of low risk after a normal scan? *J Nucl Cardiol* 2012;**19**:901-06.
30. Elhendy A, Schinkel A, Bax JJ, *et al.* Long-term prognosis after a normal exercise stress Tc-99m sestamibi SPECT study. *J Nucl Cardiol* 2003;**10**:261-66.
31. Pavin D, Delonca J, Siegenthaler M, *et al.* Long-term (10 years) prognostic value of a normal thallium-201 myocardial exercise scintigraphy in patients with coronary artery disease documented by angiography. *Eur Heart J* 1997;**18**:69-77.
32. Corti R, Fuster V, Badimon JJ. Pathogenetic concepts of acute coronary syndromes. *J Am Coll Cardiol* 2003;**41**:7S-14S.
33. Little WC, Constantinescu M, Applegate RJ, *et al.* Can coronary angiography predict the site of a subsequent myocardial infarction in patients with mild-to-moderate coronary artery disease? *Circulation* 1988;**78**:1157-66.
34. Naqvi TZ, Hachamovitch R, Berman D, *et al.* Does the presence and site of myocardial ischemia on perfusion scintigraphy predict the occurrence and site of future myocardial infarction in patients with stable coronary artery disease? *Am J Cardiol* 1997;**79**:1521-24.



- 1  
2  
3  
4  
5  
6  
7  
8  
9  
10  
11  
12  
13  
14  
15  
16  
17  
18  
19  
20  
21  
22  
23  
24  
25  
26  
27  
28  
29  
30  
31  
32  
33  
34  
35  
36  
37  
38  
39  
40  
41  
42  
43  
44  
45  
46  
47  
48  
49  
50  
51  
52  
53  
54  
55  
56  
57  
58  
59  
60
35. Pozo E, Agudo-Quilez P, Rojas-Gonzalez A, *et al.* Noninvasive diagnosis of vulnerable coronary plaque. *World J Cardiol* 2016;**8**:520-33. doi: 10.4330/wjc.v8.i9.520 [published Online First: 2016/10/11]
36. Arbab-Zadeh A, Fuster V. The myth of the "vulnerable plaque": transitioning from a focus on individual lesions to atherosclerotic disease burden for coronary artery disease risk assessment. *J Am Coll Cardiol* 2015;**65**:846-55.
37. Berman DS, Hachamovitch R, Kiat H, *et al.* Incremental value of prognostic testing in patients with known or suspected ischemic heart disease: a basis for optimal utilization of exercise technetium-99m sestamibi myocardial perfusion single-photon emission computed tomography. *J Am Coll Cardiol* 1995;**26**:639-47.
38. Berman DS, Kang X, Hayes SW, *et al.* Adenosine myocardial perfusion single-photon emission computed tomography in women compared with men. Impact of diabetes mellitus on incremental prognostic value and effect on patient management. *J Am Coll Cardiol* 2003;**41**:1125-33.
39. Bateman TM, O'Keefe JH, Jr., Williams ME. Incremental value of myocardial perfusion scintigraphy in prognosis and outcomes of patients with coronary artery disease. *Curr Opin Cardiol* 1996;**11**:613-20.
40. Hachamovitch R, Berman DS, Kiat H, *et al.* Incremental prognostic value of adenosine stress myocardial perfusion single-photon emission computed tomography and impact on subsequent management in patients with or suspected of having myocardial ischemia. *Am J Cardiol* 1997;**80**:426-33.
41. Sturmer T, Joshi M, Glynn RJ, *et al.* A review of the application of propensity score methods yielded increasing use, advantages in specific settings, but not substantially different estimates compared with conventional multivariable methods. *J Clin Epidemiol* 2006;**59**:437-47.
42. O'Keefe JH, Jr., Bateman TM, Ligon RW, *et al.* Outcome of medical versus invasive treatment strategies for non-high-risk ischemic heart disease. *J Nucl Cardiol* 1998;**5**:28-33.
43. Moroi M, Yamashina A, Tsukamoto K, *et al.* Coronary revascularization does not decrease cardiac events in patients with stable ischemic heart disease but might do in those who showed moderate to severe ischemia. *Int J Cardiol* 2011;**158**:246-52.
44. Hachamovitch R, Rozanski A, Shaw LJ, *et al.* Impact of ischaemia and scar on the therapeutic benefit derived from myocardial revascularization vs. medical therapy among patients undergoing stress-rest myocardial perfusion scintigraphy. *Eur Heart J* 2011;**32**:1012-24.
45. Al-Housni MB, Hutchings F, Dalby M, *et al.* Does myocardial perfusion scintigraphy predict improvement in symptoms and exercise capacity following successful elective percutaneous coronary intervention? *J Nucl Cardiol* 2009;**16**:869-77.

1  
2  
3  
4  
5  
6  
7  
8  
9  
10  
11  
12  
13  
14  
15  
16  
17  
18  
19  
20  
21  
22  
23  
24  
25  
26  
27  
28  
29  
30  
31  
32  
33  
34  
35  
36  
37  
38  
39  
40  
41  
42  
43  
44  
45  
46  
47  
48  
49  
50  
51  
52  
53  
54  
55  
56  
57  
58  
59  
60

46. Johansen A, Hoiland-Carlsen PF, Christensen HW, *et al.* Use of myocardial perfusion imaging to predict the effectiveness of coronary revascularisation in patients with stable angina pectoris. *Eur J Nucl Med Mol Imaging* 2005;**32**:1363-70.

For peer review only

**LEGENDS**

**Figure 1** Cumulative incidence functions. Blue lines: **Revasc**, red lines: **Med**

- a) Patients with normal MPS
- b) Patients with fixed perfusion defects

For peer review only

a)

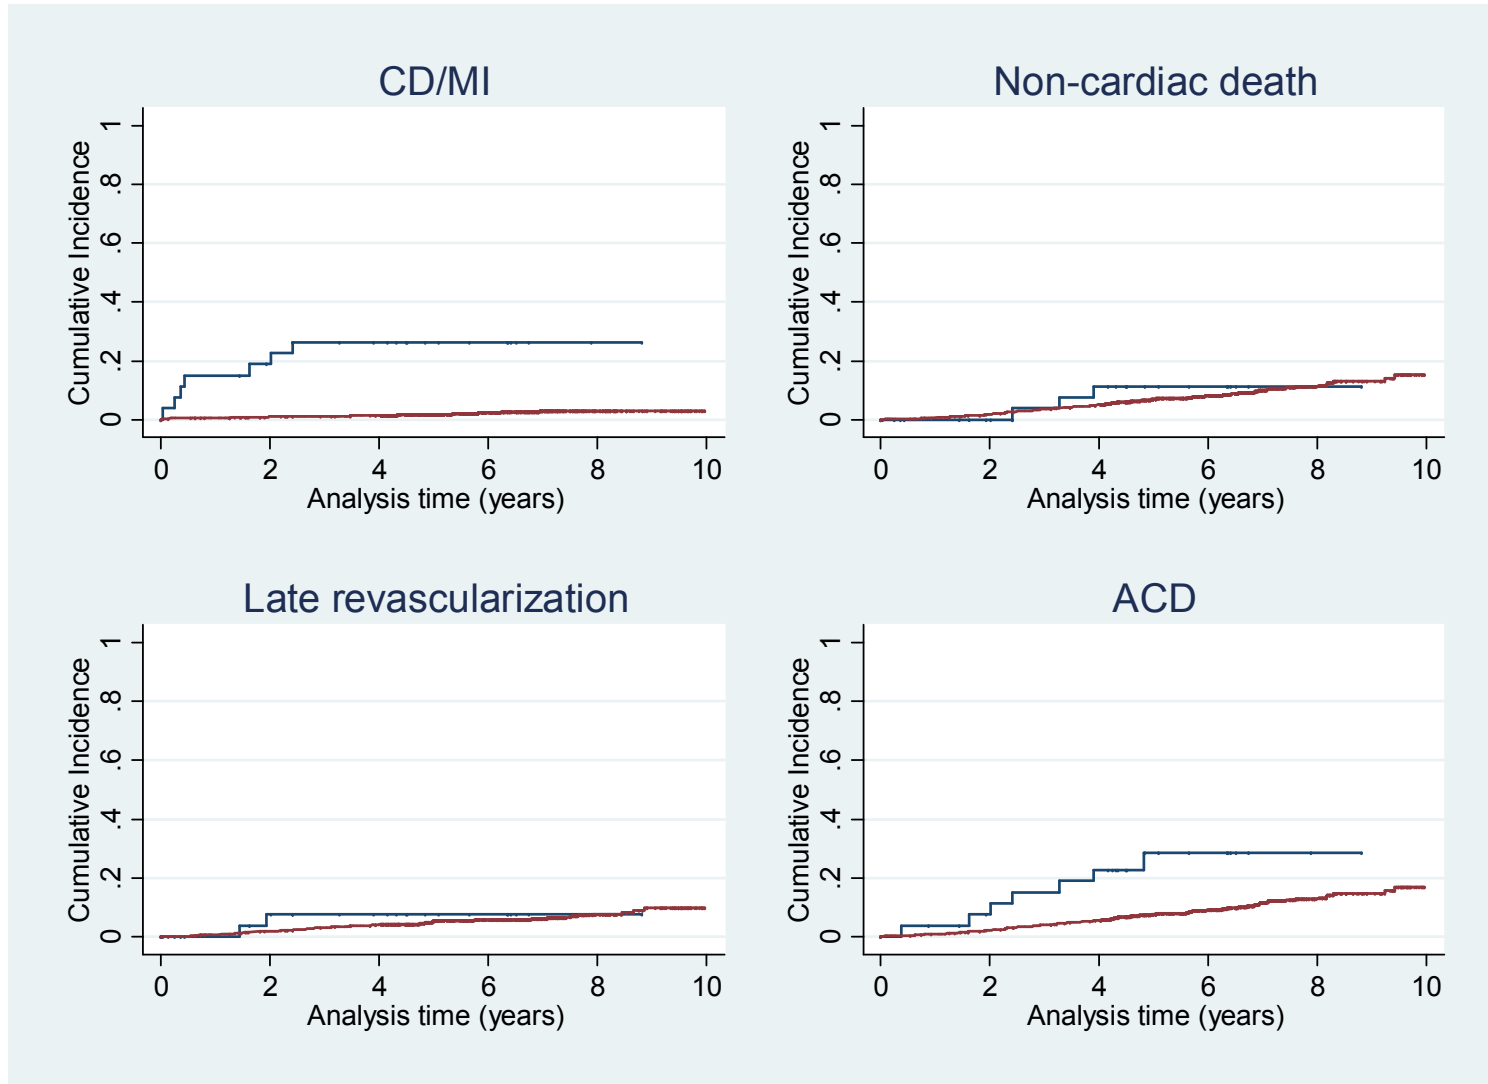

1  
2  
3  
4  
5  
6  
7  
8  
9  
10  
11  
12  
13  
14  
15  
16  
17  
18  
19  
20  
21  
22  
23  
24  
25  
26  
27  
28  
29  
30  
31  
32  
33  
34  
35  
36  
37  
38  
39  
40  
41  
42  
43  
44  
45  
46  
47  
48  
49

1  
2  
3  
4  
5  
6  
7  
8  
9  
10  
11  
12  
13  
14  
15  
16  
17  
18  
19  
20  
21  
22  
23  
24  
25  
26  
27  
28  
29  
30  
31  
32  
33  
34  
35  
36  
37  
38  
39  
40  
41  
42  
43  
44  
45  
46  
47  
48  
49

b)

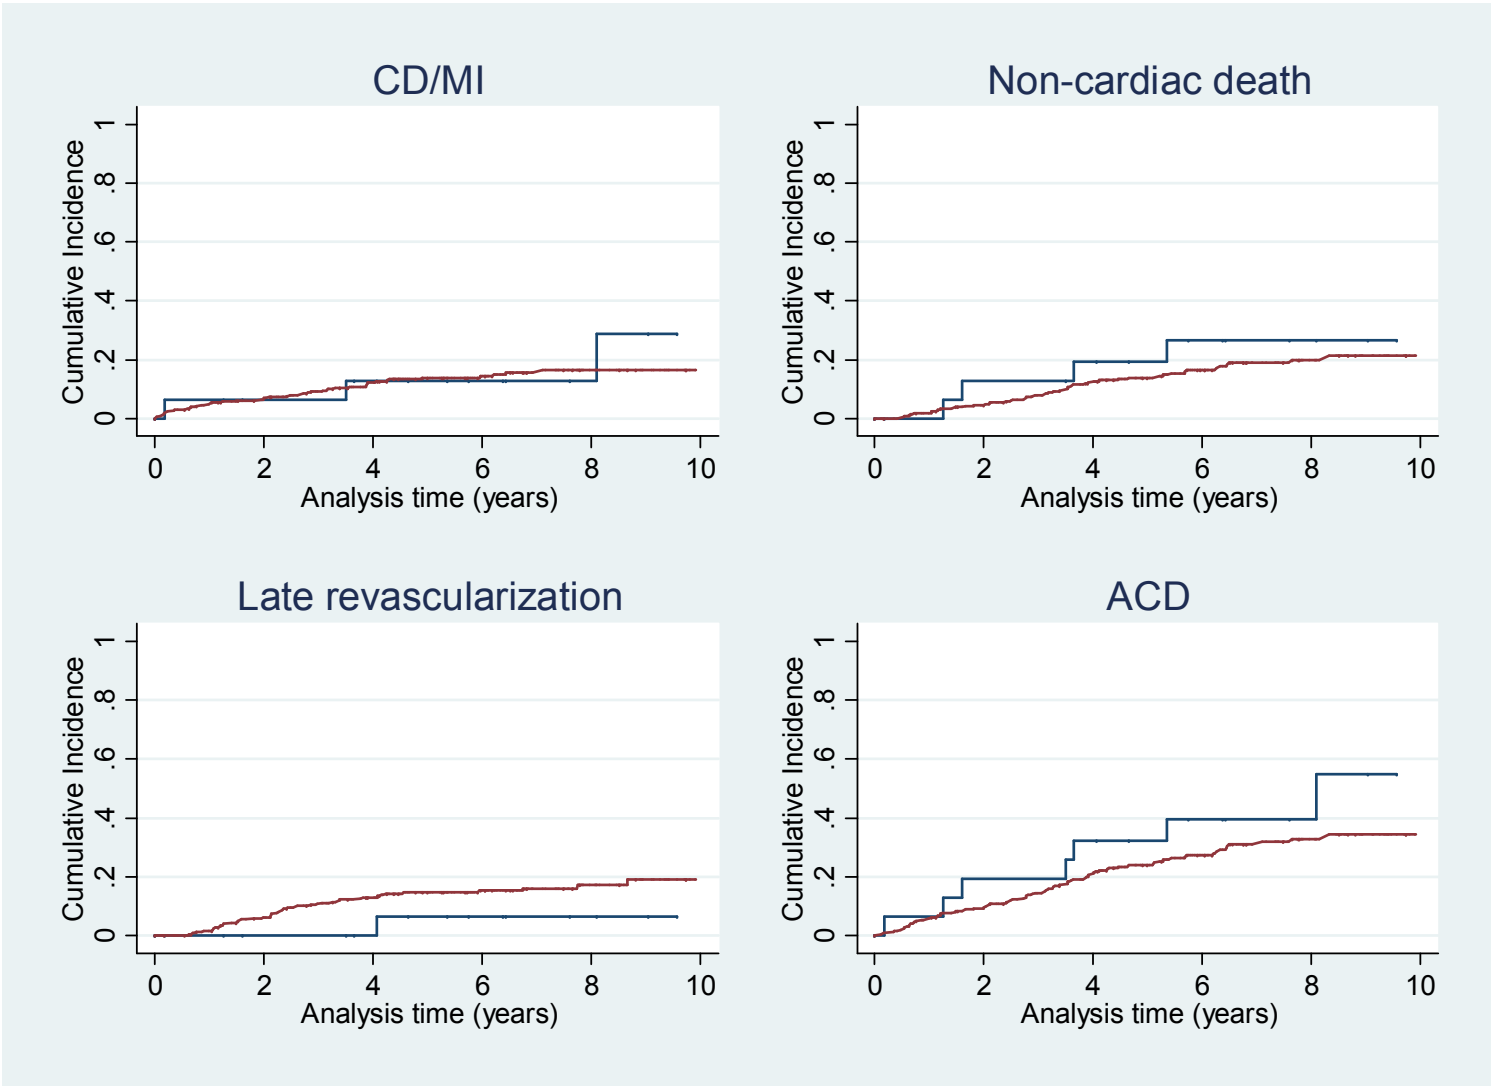

**Supplementary Table** Cause-specific hazard ratios and subdistribution hazard ratios of the **Revasc** versus **Med** difference for matched subgroups

| Normal MPS (N=52) |      |      |      |       |      |      |      | Fixed defects (N=30) |      |      |      |       |      |      |      |
|-------------------|------|------|------|-------|------|------|------|----------------------|------|------|------|-------|------|------|------|
| ACD               |      |      |      | CD/MI |      |      |      | ACD                  |      |      |      | CD/MI |      |      |      |
| CSHR              | p    | SDHR | p    | CSHR  | p    | SDHR | p    | CSHR                 | p    | SDHR | p    | CSHR  | p    | SDHR | p    |
| 7.97              | 0.05 | 7.97 | 0.06 | 4.12  | 0.08 | 4.11 | 0.07 | 1.00                 | 1.00 | 1.41 | 0.55 | 0.70  | 0.67 | 0.92 | 0.92 |

Supplementary figure. Cumulative incidence functions in matched groups. Blue line: **Revasc**, red line: **Med**  
a) Patients with normal MPS (N=52)  
b) Patients with fixed perfusion defects (N=30)

a)

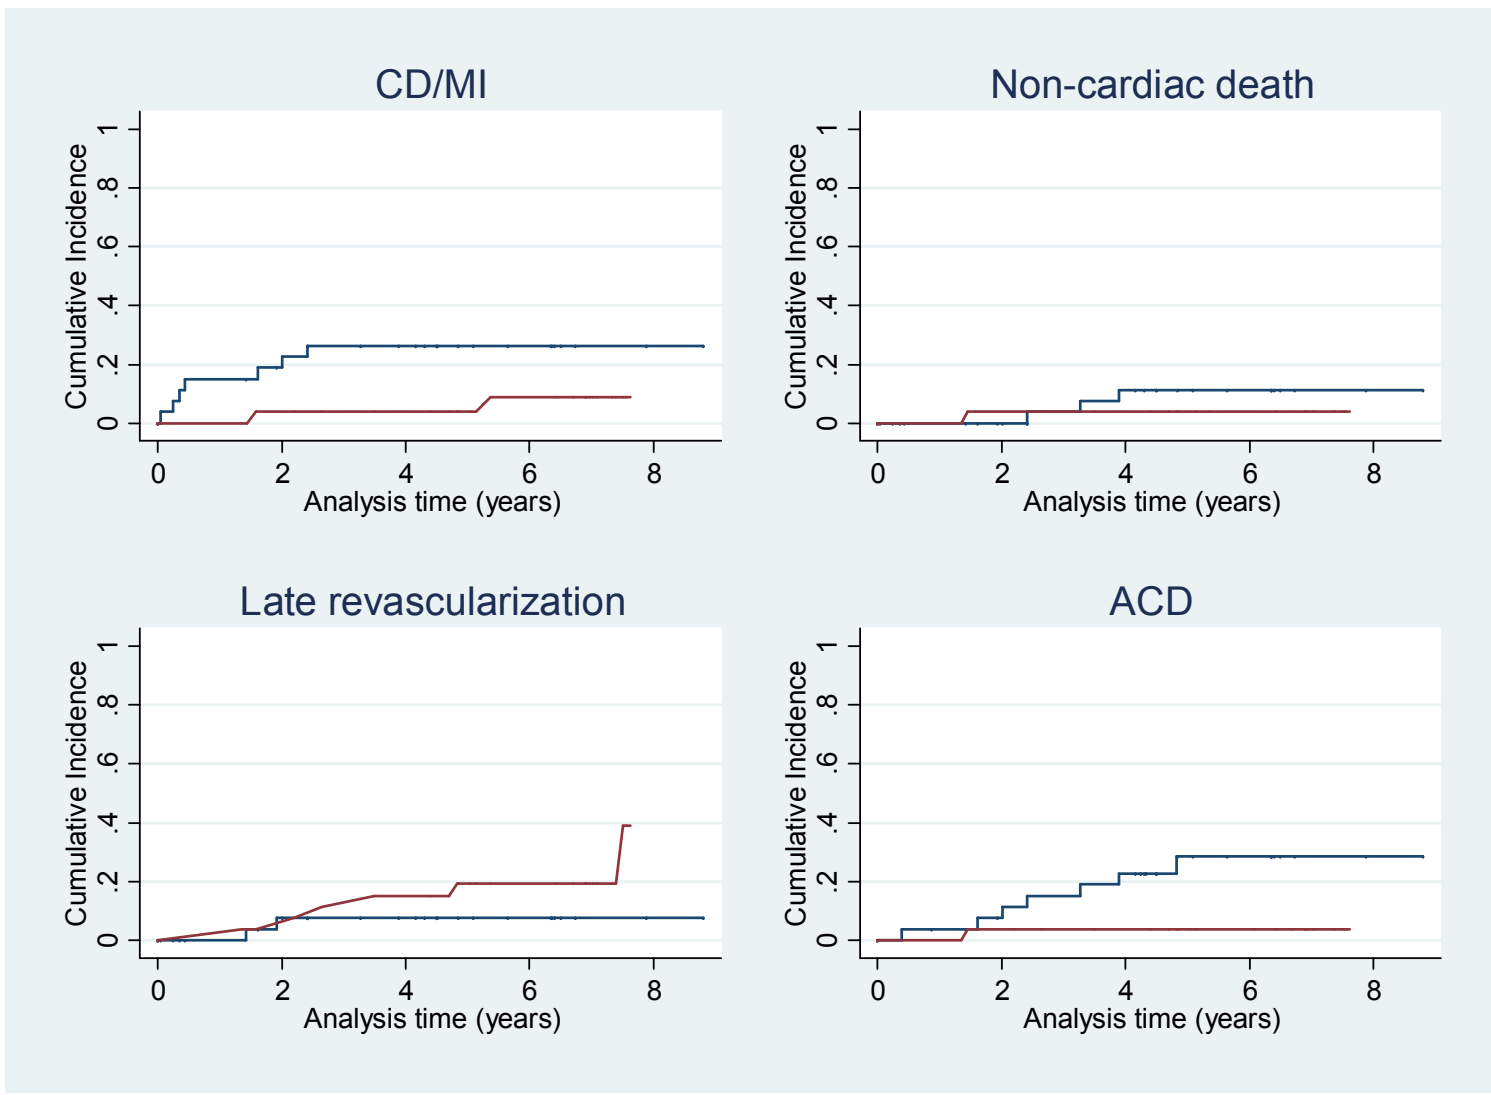

b)

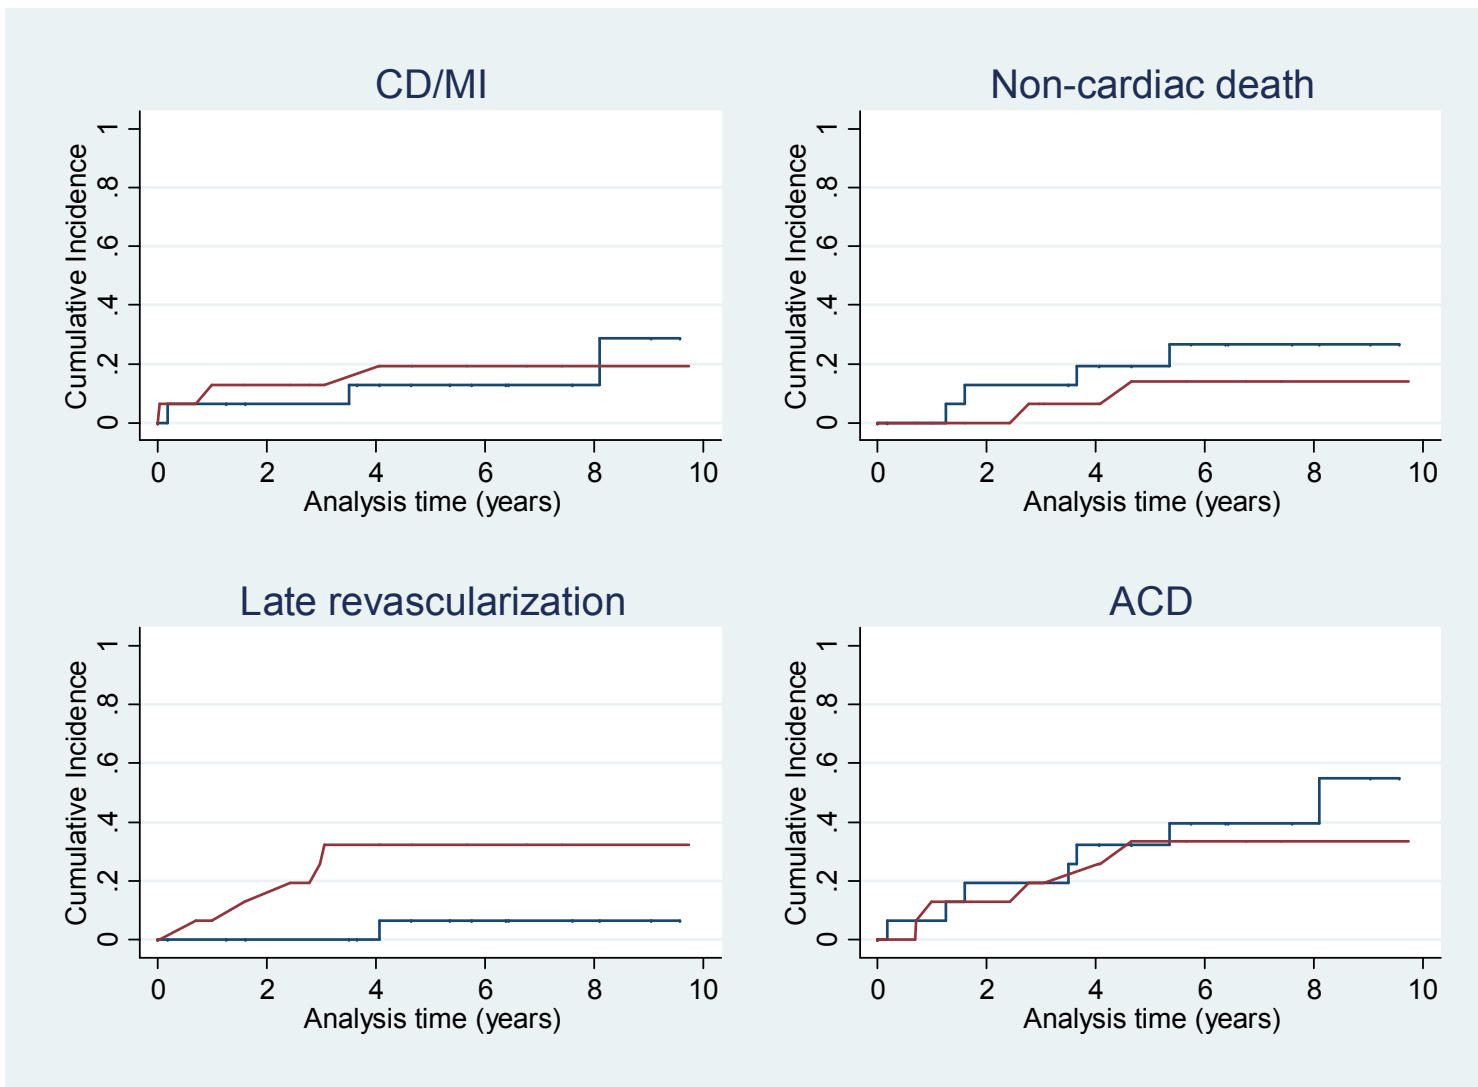



## STROBE Statement—checklist of items that should be included in reports of observational studies

|                              | Item No | Recommendation                                                                                                                                                                                                                                                                                                                                                                                                                                                                                                                                                                                                                                                                                                                                  |
|------------------------------|---------|-------------------------------------------------------------------------------------------------------------------------------------------------------------------------------------------------------------------------------------------------------------------------------------------------------------------------------------------------------------------------------------------------------------------------------------------------------------------------------------------------------------------------------------------------------------------------------------------------------------------------------------------------------------------------------------------------------------------------------------------------|
| <b>Title and abstract</b>    | 1       | (a) Indicate the study's design with a commonly used term in the title or the abstract <a href="#">p 2</a><br>(b) Provide in the abstract an informative and balanced summary of what was done and what was found <a href="#">p 2</a>                                                                                                                                                                                                                                                                                                                                                                                                                                                                                                           |
| <b>Introduction</b>          |         |                                                                                                                                                                                                                                                                                                                                                                                                                                                                                                                                                                                                                                                                                                                                                 |
| Background/rationale         | 2       | Explain the scientific background and rationale for the investigation being reported <a href="#">p 4</a>                                                                                                                                                                                                                                                                                                                                                                                                                                                                                                                                                                                                                                        |
| Objectives                   | 3       | State specific objectives, including any prespecified hypotheses <a href="#">p 4</a>                                                                                                                                                                                                                                                                                                                                                                                                                                                                                                                                                                                                                                                            |
| <b>Methods</b>               |         |                                                                                                                                                                                                                                                                                                                                                                                                                                                                                                                                                                                                                                                                                                                                                 |
| Study design                 | 4       | Present key elements of study design early in the paper <a href="#">p 5</a>                                                                                                                                                                                                                                                                                                                                                                                                                                                                                                                                                                                                                                                                     |
| Setting                      | 5       | Describe the setting, locations, and relevant dates, including periods of recruitment, exposure, follow-up, and data collection <a href="#">p 5</a>                                                                                                                                                                                                                                                                                                                                                                                                                                                                                                                                                                                             |
| Participants                 | 6       | (a) <i>Cohort study</i> —Give the eligibility criteria, and the sources and methods of selection of participants. Describe methods of follow-up <a href="#">pp 5-6</a><br><i>Case-control study</i> —Give the eligibility criteria, and the sources and methods of case ascertainment and control selection. Give the rationale for the choice of cases and controls<br><i>Cross-sectional study</i> —Give the eligibility criteria, and the sources and methods of selection of participants<br>(b) <i>Cohort study</i> —For matched studies, give matching criteria and number of exposed and unexposed ( <a href="#">p 7</a> )<br><i>Case-control study</i> —For matched studies, give matching criteria and the number of controls per case |
| Variables                    | 7       | Clearly define all outcomes, exposures, predictors, potential confounders, and effect modifiers. Give diagnostic criteria, if applicable <a href="#">pp 5-7</a>                                                                                                                                                                                                                                                                                                                                                                                                                                                                                                                                                                                 |
| Data sources/<br>measurement | 8*      | For each variable of interest, give sources of data and details of methods of assessment (measurement). Describe comparability of assessment methods if there is more than one group <a href="#">pp 5-7</a>                                                                                                                                                                                                                                                                                                                                                                                                                                                                                                                                     |
| Bias                         | 9       | Describe any efforts to address potential sources of bias <a href="#">pp 5-7</a>                                                                                                                                                                                                                                                                                                                                                                                                                                                                                                                                                                                                                                                                |
| Study size                   | 10      | Explain how the study size was arrived at <a href="#">p 5</a>                                                                                                                                                                                                                                                                                                                                                                                                                                                                                                                                                                                                                                                                                   |
| Quantitative variables       | 11      | Explain how quantitative variables were handled in the analyses. If applicable, describe which groupings were chosen and why <a href="#">pp 5-7, 11-12</a>                                                                                                                                                                                                                                                                                                                                                                                                                                                                                                                                                                                      |
| Statistical methods          | 12      | (a) Describe all statistical methods, including those used to control for confounding <a href="#">pp 6-7</a><br>(b) Describe any methods used to examine subgroups and interactions <a href="#">pp 6-7</a><br>(c) Explain how missing data were addressed <a href="#">pp 11-12</a><br>(d) <i>Cohort study</i> —If applicable, explain how loss to follow-up was addressed<br><i>Case-control study</i> —If applicable, explain how matching of cases and controls was addressed<br><i>Cross-sectional study</i> —If applicable, describe analytical methods taking account of sampling strategy<br>(e) Describe any sensitivity analyses <a href="#">p 7</a>                                                                                    |

Continued on next page

**Results**

|                  |     |                                                                                                                                                                                                                                                                                                                                                                                                                                                           |
|------------------|-----|-----------------------------------------------------------------------------------------------------------------------------------------------------------------------------------------------------------------------------------------------------------------------------------------------------------------------------------------------------------------------------------------------------------------------------------------------------------|
| Participants     | 13* | (a) Report numbers of individuals at each stage of study—eg numbers potentially eligible, examined for eligibility, confirmed eligible, included in the study, completing follow-up, and analysed <a href="#">pp 7-11</a><br>(b) Give reasons for non-participation at each stage<br>(c) Consider use of a flow diagram                                                                                                                                   |
| Descriptive data | 14* | (a) Give characteristics of study participants (eg demographic, clinical, social) and information on exposures and potential confounders <a href="#">pp 7-11</a><br>(b) Indicate number of participants with missing data for each variable of interest <a href="#">p 7-11</a><br>(c) <i>Cohort study</i> —Summarise follow-up time (eg, average and total amount)                                                                                        |
| Outcome data     | 15* | <i>Cohort study</i> —Report numbers of outcome events or summary measures over time <a href="#">p 10-11</a><br><i>Case-control study</i> —Report numbers in each exposure category, or summary measures of exposure<br><i>Cross-sectional study</i> —Report numbers of outcome events or summary measures                                                                                                                                                 |
| Main results     | 16  | (a) Give unadjusted estimates and, if applicable, confounder-adjusted estimates and their precision (eg, 95% confidence interval). Make clear which confounders were adjusted for and why they were included <a href="#">p 11-14</a><br>(b) Report category boundaries when continuous variables were categorized <a href="#">p 5</a><br>(c) If relevant, consider translating estimates of relative risk into absolute risk for a meaningful time period |
| Other analyses   | 17  | Report other analyses done—eg analyses of subgroups and interactions, and sensitivity analyses <a href="#">p 14</a>                                                                                                                                                                                                                                                                                                                                       |

**Discussion**

|                  |    |                                                                                                                                                                                                    |
|------------------|----|----------------------------------------------------------------------------------------------------------------------------------------------------------------------------------------------------|
| Key results      | 18 | Summarise key results with reference to study objectives <a href="#">p 14</a>                                                                                                                      |
| Limitations      | 19 | Discuss limitations of the study, taking into account sources of potential bias or imprecision. Discuss both direction and magnitude of any potential bias <a href="#">pp 16-17</a>                |
| Interpretation   | 20 | Give a cautious overall interpretation of results considering objectives, limitations, multiplicity of analyses, results from similar studies, and other relevant evidence <a href="#">p 14-17</a> |
| Generalisability | 21 | Discuss the generalisability (external validity) of the study results <a href="#">p 16-17</a>                                                                                                      |

**Other information**

|         |    |                                                                                                                                                                                    |
|---------|----|------------------------------------------------------------------------------------------------------------------------------------------------------------------------------------|
| Funding | 22 | Give the source of funding and the role of the funders for the present study and, if applicable, for the original study on which the present article is based <a href="#">p 18</a> |
|---------|----|------------------------------------------------------------------------------------------------------------------------------------------------------------------------------------|

\*Give information separately for cases and controls in case-control studies and, if applicable, for exposed and unexposed groups in cohort and cross-sectional studies.

**Note:** An Explanation and Elaboration article discusses each checklist item and gives methodological background and published examples of transparent reporting. The STROBE checklist is best used in conjunction with this article (freely available on the Web sites of PLoS Medicine at <http://www.plosmedicine.org/>, Annals of Internal Medicine at <http://www.annals.org/>, and Epidemiology at <http://www.epidem.com/>). Information on the STROBE Initiative is available at [www.strobe-statement.org](http://www.strobe-statement.org).

# BMJ Open

## Outcome of revascularization in stable coronary artery disease without ischaemia: a Danish registry-based follow-up study

|                                 |                                                                                                                                                                                                                                                                                                                                                                                                                                                                                                                                                                                                                                                                                                                                                                                                                                                                                                                |
|---------------------------------|----------------------------------------------------------------------------------------------------------------------------------------------------------------------------------------------------------------------------------------------------------------------------------------------------------------------------------------------------------------------------------------------------------------------------------------------------------------------------------------------------------------------------------------------------------------------------------------------------------------------------------------------------------------------------------------------------------------------------------------------------------------------------------------------------------------------------------------------------------------------------------------------------------------|
| Journal:                        | <i>BMJ Open</i>                                                                                                                                                                                                                                                                                                                                                                                                                                                                                                                                                                                                                                                                                                                                                                                                                                                                                                |
| Manuscript ID                   | bmjopen-2017-016169.R1                                                                                                                                                                                                                                                                                                                                                                                                                                                                                                                                                                                                                                                                                                                                                                                                                                                                                         |
| Article Type:                   | Research                                                                                                                                                                                                                                                                                                                                                                                                                                                                                                                                                                                                                                                                                                                                                                                                                                                                                                       |
| Date Submitted by the Author:   | 23-Jun-2017                                                                                                                                                                                                                                                                                                                                                                                                                                                                                                                                                                                                                                                                                                                                                                                                                                                                                                    |
| Complete List of Authors:       | Simonsen, Jane; Odense Universitetshospital, Dept. of Nuclear Medicine<br>Mickley, Hans; Odense Universitetshospital, Dept. of Cardiology<br>Johansen, Allan; Odense Universitetshospital, Dept. of Nuclear Medicine<br>Hess, Søren; Odense Universitetshospital, Dept. of Nuclear Medicine<br>Thomassen, Anders; Odense Universitetshospital, Dept. of Nuclear Medicine<br>Gerke, Oke; Odense Universitetshospital, Dept. of Nuclear Medicine;<br>University of Southern Denmark, Centre of Health Economics Research<br>Jensen, Lisette; Odense University Hospital, Department of Cardiology, Catheterization Lab<br>Hallas, Jesper; University of Southern Denmark, Clinical Pharmacology<br>Vach, Werner; University of Freiburg, Clinical Epidemiology, Institute for Medical Biometry and Statistics, Medical Faculty<br>Hoilund-Carlsen, Poul ; Odense Universitetshospital, Dept. of Nuclear Medicine |
| <b>Primary Subject Heading</b>: | Cardiovascular medicine                                                                                                                                                                                                                                                                                                                                                                                                                                                                                                                                                                                                                                                                                                                                                                                                                                                                                        |
| Secondary Subject Heading:      | Diagnostics                                                                                                                                                                                                                                                                                                                                                                                                                                                                                                                                                                                                                                                                                                                                                                                                                                                                                                    |
| Keywords:                       | Ischaemic heart disease < CARDIOLOGY, Myocardial perfusion imaging, Functional ischaemia test, Survival benefit, All-cause death                                                                                                                                                                                                                                                                                                                                                                                                                                                                                                                                                                                                                                                                                                                                                                               |
|                                 |                                                                                                                                                                                                                                                                                                                                                                                                                                                                                                                                                                                                                                                                                                                                                                                                                                                                                                                |

SCHOLARONE™  
Manuscripts

1  
2  
3  
4 **Outcome of revascularization in stable coronary artery disease without ischaemia: a**  
5  
6 **Danish registry-based follow-up study**  
7  
8  
9

10 Jane A. Simonsen<sup>1</sup>, Hans Mickley<sup>2</sup>, Allan Johansen<sup>1</sup>, Søren Hess<sup>1</sup>, Anders Thomassen<sup>1</sup>, Oke  
11 Gerke<sup>1,3</sup>, Lisette O. Jensen<sup>2</sup>, Jesper Hallas<sup>4</sup>, Werner Vach<sup>5\*</sup>, Poul F. Hoiland-Carlsen<sup>1\*</sup>  
12  
13  
14

15  
16  
17 <sup>1</sup>Department of Nuclear Medicine, Odense University Hospital, Odense, Denmark,  
18

19 <sup>2</sup>Department of Cardiology, Odense University Hospital, Odense, Denmark, <sup>3</sup>Centre of  
20 Health Economics Research, University of Southern Denmark, Odense, Denmark,  
21  
22

23 <sup>4</sup>Department of Clinical Pharmacology, Institute of Public Health, University of Southern  
24 Denmark, Odense, Denmark, <sup>5</sup>Clinical Epidemiology, Institute for Medical Biometry and  
25 Statistics, Medical Faculty – Medical Center, University of Freiburg, Freiburg, Germany  
26  
27  
28

29 \*Shared last authorship  
30  
31  
32  
33  
34

35 **Address for correspondence:**  
36

37 Jane Angel Simonsen  
38

39 Department of Nuclear Medicine  
40

41 Odense University Hospital  
42

43 DK-5000 Odense C  
44

45 Phone: + 45 6541 2981  
46

47 Fax: + 45 6590 6192  
48

49 Email: [jane.simonsen@rsyd.dk](mailto:jane.simonsen@rsyd.dk)  
50  
51  
52  
53  
54

55 Word count : 2,805  
56  
57  
58  
59  
60

**ABSTRACT**

**Objectives** In stable coronary artery disease (CAD), coronary revascularization may reduce mortality of patients with a certain amount of left ventricular myocardial ischaemia.

However, revascularization does not always follow the guidance suggested by ischaemia testing. We compared outcomes in patients without ischaemia who had either revascularization or medical treatment.

**Design and population** Based on registries, 1,327 consecutive patients with normal myocardial perfusion scintigraphy (MPS) and 278 with fixed perfusion defects were followed for a median of 6.1 years. Most patients received medical therapy alone (**Med**), but 26 (2%) with a normal MPS and 15 (5%) with fixed perfusion defects underwent revascularization (**Revasc**).

**Outcome measures** Incidence rates of all-cause death (ACD) and rates of cardiac death/myocardial infarction (CD/MI).

**Results** With a normal MPS, the ACD rate was 6.2%/year in the **Revasc** group versus 1.9%/year in the **Med** group ( $p=0.01$ ); the CD/MI rates were 6.9%/year and 0.6%/year, respectively ( $p<0.00001$ ). Results persisted after adjustment for predictors of revascularization, in particular angina score, and in comparisons of matched **Revasc** and **Med** patients. With fixed defects, the ACD rate was 9.1%/year in the **Revasc** group and 6.7%/year in the **Med** group ( $p=0.44$ ); the CD/MI rate was 5.0%/year versus 4.2%/year, respectively ( $p=0.69$ ). If adjusted for angiographic variables or analyzed in matched subsets differences remained insignificant.

**Conclusions** With normal MPS, revascularization conferred a higher risk, even after adjustment for predictors of revascularization. With fixed defects, the **Revasc** versus **Med** difference was close to equipoise. Hence, in patients with stable CAD without ischaemia, we could not find evidence to justify exceptional revascularization.

**Strengths and limitations of this study**

- The observational design gave a rare chance to study outcome in a clinical setting, where MPS results were open to referring clinicians
- Endpoints were collected from comprehensive national registries ensuring a high validity
- Rationales for the choice of post-MPS treatment were found in medical records, which may have reduced the ability to address explanatory factors
- The major limitation was the small material with small subsets of patients revascularized
- However, careful adjustment was undertaken in order to achieve a fair comparison of subgroups, and a matching approach was also used
- We focused on hard events, which are indisputable. On the other side, we cannot tell from the present material whether revascularization yielded an amelioration of symptoms.

w only

## INTRODUCTION

In stable angina pectoris patients at low to intermediate risk of coronary artery disease (CAD), it is recommended to use non-invasive testing as a gatekeeper to coronary angiography<sup>1 2</sup>. Myocardial perfusion scintigraphy (MPS) is an ischaemia test that effectively stratifies patients with an intermediate pre-test risk into groups with low or high post-test risk and, hence, identifies potential candidates for coronary revascularization<sup>3-5</sup>. Revascularization is often performed with the intention to improve symptoms or prognosis; however, a survival benefit over optimal medical therapy has not been documented in stable CAD patients<sup>6-8</sup>. Data from registry-based studies suggest that only in the presence of a certain amount of ischaemia is the prognosis with respect to hard events better with coronary revascularization than with conservative therapy<sup>9 10</sup>. Nevertheless, in daily routine a small proportion of patients with normal MPS or fixed defects still undergoes revascularization. It remains an open question whether this reflects a clinically justified exception to the regular practice. Addressing this question is a non-trivial task, as a potential inferior prognosis in the revascularized patients may simply reflect a proper clinical selection of high-risk patients with a real need for revascularization, regardless of the MPS result. Comparison of patients with similar risk profiles as regards potential prognostic factors related to the treatment decision might allow for an answer. In an observational design we compared the outcome with and without coronary revascularization in consecutive patients with symptoms of stable CAD but without ischaemia in a setting, where the MPS results were open to the treating physicians.

## MATERIALS AND METHODS

## Study population and design

From a consecutive series of 2,157 MPS performed 2002-2007 at Odense University Hospital for suspected or known CAD in patients who did not participate in a research project, 1,327 patients had normal scintigraphic findings while 278 demonstrated fixed perfusion defects. Results were analyzed for all patients and for subsets undergoing early revascularization (**Revasc**) or receiving pure medical therapy (**Med**). Early revascularization was defined as percutaneous coronary intervention (PCI) or coronary artery bypass grafting (CABG) within 180 days from MPS, while performed >180 days later was termed late revascularization. Trial design and methods were published previously<sup>11</sup>. The study was approved by the local data protection committee.

## MPS

MPS was performed as single photon emission computed tomography (SPECT) with technetium-99m sestamibi using a standard maximum exercise test or pharmacological stress by adenosine, dipyridamol, or dobutamine. In the early study period non-gated acquisitions were used. Later, gated studies were used with at-rest left ventricular ejection fraction (LVEF) being available in 648 patients (49%) with normal MPS and 147 patients (53%) with fixed defects. For post-stress LVEF, the numbers were 687 (52%) and 123 (44%), respectively. Scans were interpreted semi-quantitatively and deemed normal in case of normal radionuclide distribution throughout the myocardium in the presence also of normalcy with respect to available non-perfusion markers like wall thickening/motion, ventricular size, and LVEF. All abnormal scans were reviewed by an experienced reader (AJ) blinded to clinical data. Extent and severity of perfusion defects at stress imaging were converted to



1  
2 percentage myocardium and categorized as small (5-9% of the myocardium), moderate (10-  
3  
4 14%), or large (>14%)<sup>12</sup>.  
5  
6  
7

## 8 **Follow-up**

9  
10  
11  
12 History of CAD and medication at the time of MPS were retrieved from medical records and  
13 MPS reports. Follow-up ran from the date of the MPS until 31<sup>st</sup> December 2011. Events  
14 during follow-up were appointed by means of regional and national registers as previously  
15 described<sup>11</sup>. Medical records were examined for treatment decision, and angiographic data  
16 were obtained from the Western Denmark Heart Registry comprising records on all coronary  
17 angiographies and revascularization procedures performed in Western Denmark, including  
18 angina score according to the Canadian Cardiovascular Society (CCS)<sup>13</sup>.  
19  
20  
21  
22  
23  
24  
25  
26  
27  
28  
29

## 30 **Statistics**

31  
32  
33  
34  
35 Continuous and categorical variables are shown by means of descriptive statistics and  
36 frequency counts including percentages, respectively. Inter-group differences in continuous  
37 variables were tested by the Wilcoxon rank-sum test; frequencies were compared by Fisher's  
38 exact test or the chi-squared test. Main endpoints were all-cause death (ACD) and cardiac  
39 death (defined as death from ischaemic heart disease, congestive heart failure, or malignant  
40 arrhythmia) or non-fatal myocardial infarction (CD/MI). Time until event is illustrated with  
41 cumulative incidence functions. Cause-specific hazard ratios (CSHR) based on a Cox  
42 proportional hazard model as well as subdistribution hazard ratios (SDHR) based on the Fine  
43 and Gray regression model<sup>14</sup> were used to assess the difference between **Revasc** and **Med**.  
44  
45  
46  
47  
48  
49  
50  
51  
52  
53  
54  
55  
56  
57  
58  
59  
60  
The HRs were adjusted for main predictors of revascularization, which were identified by  
comparison of the two treatment groups and an analysis of the reasons given in the medical

records of revascularized patients. Adjustment was performed for one covariate at a time as well as in multivariate models. When considering ACD, late revascularization was regarded as a competing event in order not to bias the natural course. When considering CD/MI, non-cardiac death and late revascularization were regarded as competing events. Following the general advice to consider all competing events in the statistical analysis<sup>15 16</sup>, we present cumulative incidence functions for all four events but restrict reporting of HRs to the two main endpoints.

Furthermore, a matching approach was used. For each revascularized patient we found a medically treated match with identical or nearly identical values for the variables predictive of revascularization. Event incidences for the revascularized patients and their matches were compared by cumulative incidence curves, CSHRs and SDHRs.

The significance level was set to 5%. Statistical analyses were performed with STATA (©StataCorp LP, Texas, USA). Matching was performed with the 'optmatch' program<sup>17</sup> and incidence rates were compared with the 'stir' command.

## RESULTS

Early revascularization was performed in 26 patients (2%) with normal MPS and in 15 patients (5%) with fixed defects. Characteristics are given in table 1.

**Table 1** Patient characteristics

a) Patients with normal MPS

|                      | All       | Revasc    | Med       | p       |
|----------------------|-----------|-----------|-----------|---------|
| N                    | 1327      | 26        | 1301      |         |
| Age, years (mean±SD) | 59.5±11.8 | 62.1±12.2 | 59.5±11.8 | 0.29    |
| Male                 | 574 (43)  | 17 (65)   | 557 (43)  | 0.03    |
| Known CAD            | 248 (19)  | 15 (58)   | 233 (18)  | <0.0001 |
| History              |           |           |           |         |
| MI                   | 87 (7)    | 6 (23)    | 81 (6)    | 0.005   |
| PCI                  | 149 (11)  | 12 (46)   | 137 (11)  | <0.0001 |

|                                          |           |           |           |         |
|------------------------------------------|-----------|-----------|-----------|---------|
| CABG                                     | 59 (4)    | 2 (8)     | 57 (4)    | 0.32    |
| Diabetes mellitus                        | 202 (15)  | 5 (19)    | 197 (15)  | 0.58    |
| Medication                               |           |           |           |         |
| Aspirin                                  | 797 (60)  | 23 (88)   | 774 (59)  | 0.001   |
| Beta blocker                             | 462 (35)  | 20 (77)   | 442 (34)  | <0.0001 |
| Calcium channel blocker                  | 325 (24)  | 9 (35)    | 316 (24)  | 0.25    |
| Nitrates                                 | 279 (21)  | 8 (31)    | 271 (21)  | 0.23    |
| Lipid-lowering agents                    | 481 (36)  | 16 (62)   | 465 (36)  | 0.01    |
| LVEF, rest, N                            | 648       | 15        | 633       | 1.00    |
| <30%                                     | 0         | 0         | 0         |         |
| 30≤LVEF<50 %                             | 34 (5)    | 0         | 34 (5)    |         |
| ≥50%                                     | 614 (95)  | 15 (100)  | 599 (95)  |         |
| LVEF, stress, N                          | 687       | 16        | 671       | 0.63    |
| <30%                                     | 0         | 0         | 0         |         |
| 30≤LVEF<50%                              | 41 (6)    | 0         | 41 (6)    |         |
| ≥50%                                     | 646 (94)  | 16 (100)  | 630 (94)  |         |
| Family history of CAD, N                 | 216       | 23        | 193       | 0.83    |
| Positive                                 | 113 (52)  | 13 (57)   | 100 (52)  |         |
| CCS score, N                             | 223       | 26        | 197       | 0.01    |
| 1                                        | 122 (55)  | 10 (38)   | 112 (57)  |         |
| 2                                        | 76 (34)   | 8 (31)    | 68 (35)   |         |
| 3                                        | 24 (11)   | 8 (31)    | 16 (8)    |         |
| 4                                        | 1 (0.4)   | 0         | 1 (0.5)   |         |
| Smoking, N                               | 203       | 22        | 181       | 0.41    |
| Current                                  | 56 (28)   | 8 (36)    | 48 (27)   |         |
| Never                                    | 79 (39)   | 6 (27)    | 73 (40)   |         |
| Ceased                                   | 68 (34)   | 8 (36)    | 60 (33)   |         |
| Number of stenotic vessels, N            | 210       | 26        | 184       | <0.0001 |
| 0 vessels                                | 101 (48)  | 2 (8)     | 99 (54)   |         |
| 1 vessel                                 | 59 (28)   | 10 (38)   | 49 (27)   |         |
| 2 vessels                                | 30 (14)   | 7 (27)    | 23 (13)   |         |
| 3 vessels                                | 20 (10)   | 7 (27)    | 13 (7)    |         |
| b) Patients with fixed perfusion defects |           |           |           |         |
|                                          | All       | Revasc    | Med       | p       |
| N                                        | 278       | 15        | 263       |         |
| Age, years (mean±SD)                     | 62.5±10.2 | 61.6±11.5 | 62.6±10.1 | 0.63    |
| Male                                     | 214 (77)  | 14 (93)   | 200 (76)  | 0.20    |
| Known CAD                                | 196 (71)  | 11 (73)   | 185 (70)  | 1.00    |
| History                                  |           |           |           |         |
| MI                                       | 152 (55)  | 8 (53)    | 144 (55)  | 1.00    |
| PCI                                      | 101 (36)  | 6 (40)    | 95 (36)   | 0.79    |
| CABG                                     | 76 (27)   | 3 (20)    | 73 (28)   | 0.77    |
| Diabetes mellitus                        | 59 (21)   | 5 (33)    | 54 (21)   | 0.33    |
| Medication                               |           |           |           |         |
| Aspirin                                  | 233 (84)  | 12 (80)   | 221 (84)  | 0.72    |
| Beta blocker                             | 177 (64)  | 9 (60)    | 168 (64)  | 0.79    |
| Calcium channel blocker                  | 76 (27)   | 6 (40)    | 70 (27)   | 0.25    |
| Nitrates                                 | 75 (27)   | 4 (27)    | 71 (27)   | 1.00    |
| Lipid-lowering agents                    | 169 (61)  | 8 (53)    | 161 (61)  | 0.59    |
| Size of defects                          |           |           |           | 0.62    |
| Small (5-9%)                             | 92 (33)   | 4 (27)    | 88 (33)   |         |
| Medium (10-14%)                          | 60 (22)   | 2 (13)    | 58 (22)   |         |
| Large (>14%)                             | 126 (45)  | 9 (60)    | 117 (45)  |         |
| LVEF, rest, N                            | 147       | 4         | 143       | 0.79    |
| <30%                                     | 20 (14)   | 0         | 20 (14)   |         |
| 30≤LVEF<50%                              | 57 (39)   | 1 (25)    | 56 (39)   |         |

|                               |         |         |         |       |
|-------------------------------|---------|---------|---------|-------|
| ≥50%                          | 70 (48) | 3 (75)  | 67 (47) |       |
| LVEF, stress, N               | 123     | 5       | 118     | 0.84  |
| <30%                          | 21 (17) | 0       | 21 (18) |       |
| 30≤LVEF<50%                   | 48 (39) | 2 (40)  | 46 (39) |       |
| ≥50%                          | 54 (44) | 3 (60)  | 51 (43) |       |
| Family history of CAD, N      | 106     | 14      | 92      | 0.77  |
| Positive                      | 45 (42) | 5 (36)  | 40 (43) |       |
| CCS score, N                  | 115     | 15      | 100     | 0.13  |
| 1                             | 73 (63) | 7 (47)  | 66 (66) |       |
| 2                             | 25 (22) | 3 (20)  | 22 (22) |       |
| 3                             | 16 (14) | 5 (33)  | 11 (11) |       |
| 4                             | 1 (1)   | 0       | 1 (1)   |       |
| Smoking, N                    | 102     | 13      | 89      | 1.00  |
| Current                       | 36 (35) | 5 (38)  | 31 (35) |       |
| Never                         | 19 (19) | 2 (15)  | 17 (19) |       |
| Ceased                        | 47 (46) | 6 (46)  | 41 (46) |       |
| Number of stenotic vessels, N | 108     | 15      | 93      | 0.002 |
| 0 vessels                     | 15 (14) | 0       | 15 (16) |       |
| 1 vessel                      | 26 (24) | 3 (20)  | 23 (25) |       |
| 2 vessels                     | 34 (31) | 11 (73) | 23 (25) |       |
| 3 vessels                     | 33 (31) | 1 (7)   | 32 (34) |       |

The decision to revascularize was clearly associated with symptoms and angiographic findings but less with MPS results (table 2). In four cases of normal MPS, revascularization was performed following a new incident independent of the symptoms prompting MPS.

**Table 2** Reasons for revascularization according to medical records

a) Patients with normal MPS

| DM | History   | Angio findings* | CCS score | Time from MPS to revasc. (days) | Type of revasc. | Reasoning to decide for revascularization was based on |
|----|-----------|-----------------|-----------|---------------------------------|-----------------|--------------------------------------------------------|
|    |           | 0-VD            | 3         | 83                              | PCI             | Angio, sympt, EET                                      |
|    | PCI       | 2-VD            | 2         | 72                              | PCI             | Angio, sympt, ECG changes during dobutamine stress     |
| +  |           | 2-VD            | 2         | 159                             | CABG            | Angio, sympt, IVUS                                     |
|    | MI, PCI   | 2-VD            | 2         | 127                             | PCI             | Angio, EET, history of MI                              |
| +  |           | 1-VD            | 1         | 157                             | PCI             | MI, i.e., recurrent event                              |
|    |           | 3-VD            | 3         | 5                               | PCI             | Angio                                                  |
| +  |           | 1-VD            | 3         | 71                              | PCI             | Angio, sympt                                           |
|    | PCI, CABG | 3-VD            | 1         | 169                             | PCI             | Angio, sympt                                           |
|    |           | 0-VD            | 1         | 49                              | PCI             | Angio, IVUS, EET                                       |
|    |           | 1-VD            | 1         | 93                              | PCI             | MI, i.e., recurrent event                              |
|    |           | 1-VD            | 2         | 149                             | PCI             | Angio, IVUS, sympt                                     |
|    | PCI       | 2-VD            | 1         | 131                             | PCI             | MI, i.e., recurrent event                              |
|    | PCI       | 1-VD            | 1         | 116                             | PCI             | Angio, sympt                                           |
| +  | MI, PCI   | 3-VD            | 3         | 43                              | PCI             | Angio, sympt                                           |
|    |           | 1-VD            | 3         | 170                             | CABG            | Angio, IVUS, persistent sympt                          |
|    |           | 1-VD            | 2         | 43                              | PCI             | Angio, persistent sympt                                |
|    |           | 1-VD            | 1         | 145                             | PCI             | Angio, sympt                                           |
|    | MI, PCI   | 3-VD            | 3         | 95                              | PCI             | Angio, sympt                                           |
| +  | MI, PCI   | 2-VD            | 2         | 104                             | PCI             | Angio, sympt                                           |

|  |               |      |   |     |      |                                            |
|--|---------------|------|---|-----|------|--------------------------------------------|
|  | MI, PCI       | 3-VD | 3 | 104 | CABG | Angio, sympt                               |
|  | PCI           | 1-VD | 3 | 37  | PCI  | Angio, sympt                               |
|  | MI, PCI, CABG | 3-VD | 1 | 16  | PCI  | MI, i.e., recurrent event                  |
|  | PCI           | 3-VD | 1 | 43  | PCI  | Angio, sympt                               |
|  |               | 1-VD | 2 | 76  | PCI  | Angio, sympt                               |
|  |               | 2-VD | 1 | 49  | PCI  | Angio, sympt                               |
|  |               | 2-VD | 2 | 53  | PCI  | Angio, ECG changes during adenosine stress |

## b) Patients with fixed defects

| DM | History       | Size of defect | Angio findings* | CCS score | Time from MPS to revasc. (days) | Type of revasc. | Reasoning to decide for revascularization was based on |
|----|---------------|----------------|-----------------|-----------|---------------------------------|-----------------|--------------------------------------------------------|
|    | MI, CABG, PCI | Large          | 3-VD            | 3         | 36                              | PCI             | Sympt, angio                                           |
| +  | MI, CABG      | Large          | 2-VD            | 3         | 49                              | PCI             | Angio                                                  |
|    |               | Mod.           | 1-VD            | 3         | 105                             | PCI             | Sympt, angio                                           |
|    | PCI           | Large          | 2-VD            | 3         | 158                             | PCI             | Sympt, angio                                           |
|    | MI, PCI       | Small          | 3-VD            | 2         | 98                              | CABG            | Sympt, angio                                           |
|    | PCI           | Small          | 2-VD            | 3         | 64                              | PCI             | Sympt, angio                                           |
|    |               | Small          | 2-VD            | 1         | 60                              | PCI             | Angio                                                  |
|    | MI, PCI       | Large          | 2-VD            | 1         | 70                              | CABG            | Sympt, angio                                           |
|    | MI, PCI       | Large          | 2-VD            | 1         | 72                              | PCI             | Angio                                                  |
|    | MI            | Large          | 2-VD            | 1         | 25                              | CABG            | Angio                                                  |
| +  | PCI           | Large          | 2-VD            | 1         | 148                             | PCI             | Reduced LVEF, viability, angio                         |
| +  | MI, CABG      | Large          | 2-VD            | 2         | 71                              | PCI             | Sympt, angio                                           |
| +  | MI            | Large          | 2-VD            | 1         | 16                              | CABG            | Angio                                                  |
| +  |               | Mod.           | 1-VD            | 1         | 85                              | PCI             | Sympt, angio                                           |
|    |               | Small          | 1-VD            | 2         | 77                              | PCI             | Angio                                                  |

\*None had stenosis of the left main stem. Degree and appearance of stenoses were not reported

Angio = angiography; DM = diabetes mellitus; ECG = electrocardiogram; EET = exercise ECG testing; IVUS = intravascular ultrasound; mod. = moderate; MPS = myocardial perfusion scintigraphy; sympt = symptoms; VD = vessel disease

Median follow-up (range) was 6.1 years (0.02-9.96). Table 3 shows the cumulative numbers of events during follow-up. With normal MPS, the number of MIs was higher than the number of CDs (3% versus 1%,  $p < 0.0001$ ), whereas in the patients with fixed defects, the disparity, albeit insignificant, was the reverse (10% versus 14%,  $p = 0.19$ ). In none of the MPS groups did the CD/ACD ratio differ between subgroups; being 2/7 and 14/150, respectively ( $p = 0.15$ ) in normal MPS and 3/7 versus 35/88 ( $p = 1.00$ ) in patients with fixed defects (table 3).

Table 3 Cumulative number of events during follow-up

| Events                          | Normal MPS               |                              |                                 |         | Fixed defects          |                                 |                               |      |
|---------------------------------|--------------------------|------------------------------|---------------------------------|---------|------------------------|---------------------------------|-------------------------------|------|
|                                 | All<br>N (% of<br>1,327) | <b>Revasc</b><br>N (% of 26) | <b>Med</b><br>N (% of<br>1,301) | p       | All<br>N (% of<br>278) | <b>Revasc</b><br>N (% of<br>15) | <b>Med</b><br>N (% of<br>263) | p    |
| No event                        | 1,079 (81)               | 14 (54)                      | 1,065 (82)                      |         | 140 (50)               | 7 (47)                          | 133 (51)                      |      |
| Any event<br>(death/MI/revasc.) | 248 (19)                 | 12 (46)                      | 236 (18)                        | 0.001   | 138 (50)               | 8 (53)                          | 130 (49)                      | 0.80 |
| Death                           | 157 (12)                 | 7 (27)                       | 150 (12)                        | 0.03    | 95 (34)                | 7 (47)                          | 88 (33)                       | 0.40 |
| Cardiac death                   | 16 (1)                   | 2 (8)                        | 14 (1)                          | 0.04    | 38 (14)                | 3 (20)                          | 35 (13)                       | 0.44 |
| MI                              | 43 (3)                   | 5 (19)                       | 38 (3)                          | 0.001   | 27 (10)                | 1 (7)                           | 26 (10)                       | 1.00 |
| MI or death                     | 191 (14)                 | 10 (38)                      | 181 (14)                        | 0.002   | 111 (40)               | 8 (53)                          | 103 (39)                      | 0.29 |
| MI or cardiac death             | 57 (4)                   | 7 (27)                       | 50 (4)                          | <0.0001 | 58 (21)                | 4 (27)                          | 54 (21)                       | 0.53 |
| PCI                             | 81 (6)                   | 1 (4)                        | 80 (6)                          | 1.00    | 48 (17)                | 1 (7)                           | 47 (18)                       | 0.48 |
| CABG                            | 15 (1)                   | 2 (8)                        | 13 (1)                          | 0.03    | 6 (2)                  | 0                               | 6 (2)                         | 1.00 |
| PCI/CABG                        | 92 (7)                   | 3 (12)                       | 89 (7)                          | 0.42    | 50 (18)                | 1 (7)                           | 49 (19)                       | 0.49 |
| MI/cardiac<br>death/revasc.     | 124 (9)                  | 9 (35)                       | 115 (9)                         | <0.0001 | 87 (31)                | 4 (27)                          | 83 (32)                       | 0.78 |

Cumulative incidence functions shown in figure 1 indicated no difference in the incidence of non-cardiac deaths between the two treatment groups for neither patients with normal MPS, nor patients with fixed defects. As regards late revascularization, the **Med** curve tended to run above the **Revasc** curve in case of fixed defects; however, the difference was not significant. With normal MPS, substantially different incidence rates of the main endpoints could be observed. The ACD rate was 6.2%/year in the **Revasc** group compared with 1.9%/year in the **Med** group ( $p=0.01$ ) and the CD/MI rate was 6.9%/year versus 0.6%/year, respectively ( $p<0.00001$ ). In case of fixed defects there were no significant inter-group differences, and **Revasc/Med** ratios were similar for both endpoints: The ACD rate was 9.1%/year in the **Revasc** group and 6.7%/year in the **Med** group ( $p=0.44$ ) and the CD/MI rate was 5.0%/year versus 4.2%/year, respectively ( $p=0.69$ ).

### Quantification of effects and adjustment

Judged from tables 1 and 2, variables CAD, previous MI, previous PCI, CCS score, and number of stenotic coronary arteries were associated with the decision to revascularize

despite normal MPS. The use of aspirin, beta blockers, and lipid lowering agents was unequally distributed and, hence, could be a surrogate for a disease state also predictive of revascularization. Gender was also unevenly distributed and, therefore, considered in the models. In patients with fixed effects, the only significant association found was for the number of stenotic arteries. The lack of significance for the other variables may, however, mainly reflect lack of power due to the small number of revascularized patients. It seems reasonable to assume that variables predictive of the treatment decision in patients with normal MPS would also be potential predictors in patients with fixed effects. Hence, we used the same list of (potential) predictors.

Unadjusted and adjusted CSHRs and SDHRs comparing the **Revasc** and **Med** groups are shown in table 4. Adjustment for clinical and/or angiographic variables did not change the HRs with normal MPS, which were always in the magnitude of 3-5 for ACD and >9 for CD/MI, all being significantly different from 1. With fixed defects, the HR was never significantly different from 1. Adjusted for clinical variables, the HRs for both outcomes stayed in the magnitude of 1.2 to 1.8. However, with adjustment for angiographic variables the HR changed more substantially to values around 2 for ACD and between 0.7 and 0.9 for CD/MI.

**Table 4** Cause-specific hazard ratios and subdistribution hazard ratios of the **Revasc** versus **Med** difference

a) Patients with normal MPS

|                                                                           | ACD  |         |      |       | CD/MI |         |       |         |
|---------------------------------------------------------------------------|------|---------|------|-------|-------|---------|-------|---------|
|                                                                           | CSHR | p       | SDHR | p     | CSHR  | p       | SDHR  | p       |
| Univariate analysis                                                       | 3.85 | 0.001   | 3.42 | 0.002 | 15.44 | <0.0001 | 14.09 | <0.0001 |
| <b>Adjusted for clinical variables</b>                                    |      |         |      |       |       |         |       |         |
| Age                                                                       | 3.22 | 0.003   | 3.12 | 0.005 | 12.93 | <0.0001 | 11.75 | <0.0001 |
| Gender                                                                    | 3.58 | 0.001   | 3.17 | 0.003 | 15.11 | <0.0001 | 13.85 | <0.0001 |
| Age, gender                                                               | 2.89 | 0.007   | 2.80 | 0.01  | 12.37 | <0.0001 | 11.26 | <0.0001 |
| DM                                                                        | 3.81 | 0.001   | 3.39 | 0.002 | 15.30 | <0.0001 | 13.99 | <0.0001 |
| Known CAD                                                                 | 3.76 | 0.001   | 3.47 | 0.002 | 13.04 | <0.0001 | 12.29 | <0.0001 |
| Previous MI                                                               | 3.97 | <0.0001 | 3.52 | 0.002 | 12.76 | <0.0001 | 12.01 | <0.0001 |
| Previous PCI                                                              | 4.27 | <0.0001 | 3.87 | 0.001 | 14.42 | <0.0001 | 13.45 | <0.0001 |
| CAD category*                                                             | 3.71 | 0.001   | 3.45 | 0.003 | 13.02 | <0.0001 | 12.26 | <0.0001 |
| CAD category*, previous MI                                                | 3.68 | 0.001   | 3.42 | 0.004 | 12.87 | <0.0001 | 12.48 | <0.0001 |
| CAD category*, previous MI, aspirin, beta blocker, lipid lowering         | 4.22 | <0.0001 | 3.81 | 0.001 | 11.86 | <0.0001 | 11.43 | <0.0001 |
| Gender, CAD category*, previous MI, aspirin, beta blocker, lipid lowering | 4.08 | 0.001   | 3.66 | 0.002 | 11.76 | <0.0001 | 11.34 | <0.0001 |

|                                                                                                                              |      |       |      |       |       |         |       |         |
|------------------------------------------------------------------------------------------------------------------------------|------|-------|------|-------|-------|---------|-------|---------|
| <b>Adjusted for angiographic variables</b>                                                                                   |      |       |      |       |       |         |       |         |
| CCS score (N=223/115)                                                                                                        | 4.27 | 0.003 | 3.77 | 0.006 | 12.06 | <0.0001 | 11.03 | <0.0001 |
| Number of stenotic vessels (N=210/108)                                                                                       | 4.62 | 0.005 | 4.52 | 0.006 | 9.19  | 0.001   | 9.28  | 0.001   |
| CCS score, number of stenotic vessels (N=210/108)                                                                            | 4.52 | 0.007 | 4.18 | 0.007 | 9.89  | 0.001   | 9.49  | 0.002   |
| <b>Adjusted for scintigraphic variables</b>                                                                                  |      |       |      |       |       |         |       |         |
| At-rest LVEF (N=648/147)                                                                                                     | 2.87 | 0.08  | 2.97 | 0.08  | 12.78 | <0.0001 | 12.86 | <0.0001 |
| Post-stress LVEF (N=687/123)                                                                                                 | 2.70 | 0.09  | 2.80 | 0.10  | 12.74 | <0.0001 | 12.93 | <0.0001 |
| <b>Adjusted for selected variables of all types</b>                                                                          |      |       |      |       |       |         |       |         |
| Gender, CAD category*, previous MI, aspirin, beta blocker, lipid lowering, CCS score (N=223/115)                             | 4.55 | 0.004 | 3.48 | 0.009 | 29.29 | <0.0001 | 26.69 | <0.0001 |
| Gender, CAD category*, previous MI, aspirin, beta blocker, lipid lowering, number of stenotic vessels (N=210/108)            | 4.30 | 0.02  | 3.79 | 0.03  | 11.70 | 0.001   | 11.80 | 0.001   |
| Gender, CAD category*, previous MI, aspirin, beta blocker, lipid lowering, CCS score, number of stenotic vessels (N=210/108) | 4.14 | 0.02  | 3.31 | 0.06  | 20.86 | 0.001   | 20.23 | 0.001   |

## b) Patients with fixed perfusion defects

|                                                                           | ACD  |      |      |      | CD/MI |      |      |      |
|---------------------------------------------------------------------------|------|------|------|------|-------|------|------|------|
|                                                                           | CSHR | p    | SDHR | p    | CSHR  | p    | SDHR | p    |
| Univariate analysis                                                       | 1.49 | 0.31 | 1.68 | 0.18 | 1.24  | 0.72 | 1.29 | 0.66 |
| <b>Adjusted for clinical variables</b>                                    |      |      |      |      |       |      |      |      |
| Age                                                                       | 1.50 | 0.30 | 1.75 | 0.16 | 1.26  | 0.70 | 1.28 | 0.67 |
| Gender                                                                    | 1.41 | 0.39 | 1.60 | 0.22 | 1.22  | 0.74 | 1.30 | 0.66 |
| Age, gender                                                               | 1.44 | 0.36 | 1.69 | 0.19 | 1.26  | 0.71 | 1.30 | 0.66 |
| DM                                                                        | 1.42 | 0.39 | 1.63 | 0.23 | 1.19  | 0.78 | 1.26 | 0.40 |
| Known CAD                                                                 | 1.49 | 0.31 | 1.68 | 0.17 | 1.20  | 0.76 | 1.28 | 0.67 |
| Previous MI                                                               | 1.50 | 0.31 | 1.69 | 0.17 | 1.24  | 0.72 | 1.29 | 0.66 |
| Previous PCI                                                              | 1.52 | 0.29 | 1.70 | 0.16 | 1.26  | 0.70 | 1.29 | 0.65 |
| CAD category*                                                             | 1.55 | 0.27 | 1.76 | 0.15 | 1.28  | 0.68 | 1.31 | 0.64 |
| CAD category*, previous MI                                                | 1.56 | 0.26 | 1.77 | 0.14 | 1.29  | 0.67 | 1.32 | 0.64 |
| CAD category*, previous MI, aspirin, beta blocker, lipid lowering         | 1.39 | 0.41 | 1.58 | 0.25 | 1.28  | 0.69 | 1.31 | 0.66 |
| Gender, CAD category*, previous MI, aspirin, beta blocker, lipid lowering | 1.34 | 0.47 | 1.51 | 0.30 | 1.27  | 0.69 | 1.32 | 0.65 |
| <b>Adjusted for angiographic variables</b>                                |      |      |      |      |       |      |      |      |
| CCS score (N=223/115)                                                     | 1.61 | 0.27 | 1.93 | 0.09 | 0.82  | 0.75 | 0.87 | 0.80 |
| Number of stenotic vessels (N=210/108)                                    | 2.35 | 0.09 | 2.67 | 0.06 | 0.74  | 0.65 | 0.77 | 0.69 |
| CCS score, number of stenotic vessels (N=210/108)                         | 1.76 | 0.28 | 2.27 | 0.07 | 0.64  | 0.51 | 0.73 | 0.58 |
| <b>Adjusted for scintigraphic variables</b>                               |      |      |      |      |       |      |      |      |
| At-rest LVEF (N=648/147)                                                  | 0.85 | 0.87 | 1.00 | 1.00 | -\$   | -\$  | -\$  | -\$  |
| Post-stress LVEF (N=687/123)                                              | 0.59 | 0.61 | 0.72 | 0.73 | -\$   | -\$  | -\$  | -\$  |
| Size of defects                                                           | 1.23 | 0.61 | 1.38 | 0.43 | 1.00  | 1.00 | 1.08 | 0.90 |
| <b>Adjusted for selected variables of all types</b>                       |      |      |      |      |       |      |      |      |
| Gender, CAD category*, previous MI, aspirin, beta                         | 1.54 | 0.38 | 1.99 | 0.13 | 0.89  | 0.86 | 0.94 | 0.93 |



|                                                                         |      |      |      |      |      |      |      |      |  |
|-------------------------------------------------------------------------|------|------|------|------|------|------|------|------|--|
| blocker,<br>lipid lowering, CCS score<br>(N=223/115)                    |      |      |      |      |      |      |      |      |  |
| Gender, CAD category*,<br>previous MI, aspirin, beta<br>blocker,        | 3.68 | 0.06 | 4.31 | 0.10 | 0.90 | 0.90 | 0.85 | 0.89 |  |
| lipid lowering, number of<br>stenotic vessels (N=210/108)               |      |      |      |      |      |      |      |      |  |
| Gender, CAD category*,<br>previous MI, aspirin, beta<br>blocker,        | 3.05 | 0.11 | 4.37 | 0.07 | 0.84 | 0.83 | 0.92 | 0.94 |  |
| lipid lowering, CCS score,<br>number of stenotic vessels<br>(N=210/108) |      |      |      |      |      |      |      |      |  |

\*In order to reduce the number of covariates, and because of correlation between CAD and previous revascularization, a CAD category variable was generated, taking into account the history of both CAD and previous revascularization: 1 = suspected CAD; 2 = known CAD with no previous revascularization; 3 = known CAD with previous revascularization

§Fitting of Cox-model indicated complete separation; hence, no results could be presented

Scintigraphic variables, available only in a subgroup of all patients, were also to some degree associated with treatment decisions. All the **Revasc** patients with normal MPS had LVEF  $\geq 50\%$ , whereas some of the **Med** patients had  $30 \leq \text{LVEF} < 50\%$ , cf. table 1a. Adjustment for LVEF category slightly reduced the HRs for ACD but not for CD/MI (table 4a). One out of four of the **Revasc** patients with fixed defects had a moderately reduced at-rest LVEF ( $30 \leq \text{LVEF} < 50\%$ ), but no one had a severely reduced LVEF ( $< 30\%$ ), which was the case in 14% of the **Med** patients (table 1b). Adjustment for LVEF category reduced the HRs for ACD, whereas for CD/MI, numbers were too small for an estimation. Similarly, in spite of no significant inter-group difference in size of perfusion defects, adjustment for defect size slightly reduced the HR for both endpoints (table 4b).

Results from the matching procedure can be seen from the Supplementary material. For matched subsets, results were similar to those from the entire groups; in case of normal MPS the CSHR was 7.97 ( $p=0.05$ ) for ACD, 4.12 ( $p=0.08$ ) for CD/MI. With fixed defects, the CSHR was 1.00 ( $p=1.00$ ) for ACD and 0.70 ( $p=0.67$ ) for CD/MI, respectively. Cumulative incidence functions resembled those for the entire groups. Detailed results are given in the Supplementary table and figure.

## DISCUSSION

1  
2 In this study, 2% of patients with normal MPS and 5% with fixed perfusion defects  
3  
4 underwent early coronary revascularization; i.e., exceptional revascularization. With normal  
5  
6 MPS, **Revasc** patients had significantly higher event rates than **Med** patients. With fixed  
7  
8 defects, no significant inter-group differences were observed. Results persisted after  
9  
10 adjustment for predictors of revascularization as well as after matching. Noteworthy, MPS  
11  
12 was conducted as a part of the routine diagnostic work-up and results were open to the  
13  
14 referring clinicians. Still, revascularization was undertaken in some patients, probably  
15  
16 primarily based on angiographic and clinical findings.  
17  
18  
19

### 20 21 **The use of MPS**

22  
23  
24  
25  
26 In patients with stable angina, an ischaemia test is far from always performed before  
27  
28 angiography<sup>18 19</sup>. An anatomical approach to the CAD diagnosis and quantification typically  
29  
30 leads to more revascularization procedures than a functional approach<sup>20-22</sup>. However,  
31  
32 strategies involving MPS have a greater prognostic power than those without functional  
33  
34 testing<sup>23 24</sup>.  
35  
36

37  
38 Optimal risk stratification derives from the ability of a normal MPS to identify  
39  
40 patients at exceedingly low risk, and that of an abnormal scan to identify patients at greater  
41  
42 risk, thus rendering a number of catheterization and invasive interventions superfluous<sup>25-27</sup>.  
43  
44 Following a normal MPS, the annual death rate is generally <2% and the annual rate of hard  
45  
46 cardiac events <1%, a little higher in risk groups<sup>28 29</sup>. We and others previously found a  
47  
48 general warranty period following a normal MPS of 5 years<sup>11 30</sup>. Thus, under usual  
49  
50 conditions, cardiac catheterization is not warranted in the presence of a normal study, unless  
51  
52 there is a change in symptoms.  
53  
54

55  
56 A small percentage of patients with normal scans do have events within the  
57  
58 warranty period. In our population of 1,327 patients with normal MPS, four patients (0.3%)  
59  
60

1  
2  
3  
4  
5  
6  
7  
8  
9  
10  
11  
12  
13  
14  
15  
16  
17  
18  
19  
20  
21  
22  
23  
24  
25  
26  
27  
28  
29  
30  
31  
32  
33  
34  
35  
36  
37  
38  
39  
40  
41  
42  
43  
44  
45  
46  
47  
48  
49  
50  
51  
52  
53  
54  
55  
56  
57  
58  
59  
60

underwent revascularization within 6 months from MPS because of an acute MI. One had diabetes, one had chronic kidney disease, and two had known CAD. This supports previous findings of a poorer prognosis for high-risk subgroups and underscores the additional prognostic value of clinical findings to MPS results. It also illustrates the fact that MI – more than death – is hard to anticipate<sup>31</sup>. MIs can break out in vessels with a normal appearance<sup>32</sup><sup>33</sup>, whereas stenotic and occluded arteries often come with collaterals, preventing MI or at least limiting its size<sup>34</sup>. Hence, although the occurrence of MI is associated with the presence of atherosclerosis, it may not be correlated to its severity, and therefore, MPS – like other imaging techniques – cannot predict specific lesions but patients at risk<sup>35 36</sup>.

The risk of false negative MPS results caused by balanced ischaemia was reduced as non-perfusion scan markers were also taken into consideration. Left ventricular function in the shape of LVEF has an independent prognostic and predictive value<sup>3 10</sup>. However, decision to perform revascularization in our patients was in general not based on the presence of a reduced LVEF as all **Revasc** patients with normal MPS had preserved LVEFs, and far from all patients with a LVEF below 50% underwent revascularization.

Dominant MPS parameters driving subsequent resource utilization are extent and severity of reversible perfusion defects<sup>12</sup>. In addition, a variety of clinical elements, most importantly anginal symptoms, further influence referral rates<sup>20</sup>. Thus, when patients with normal scans or scans showing only mild ischaemia are referred to angiography, this is typically based on clinical symptoms<sup>37</sup>. In former reports from the US, 3% of patients without ischaemia were referred to angiography, and revascularization was performed in one fifth of these<sup>38-40</sup>. The numbers in our series were higher.

### **Strengths and limitations**

1  
2  
3  
4  
5  
6  
7  
8  
9  
10  
11  
12  
13  
14  
15  
16  
17  
18  
19  
20  
21  
22  
23  
24  
25  
26  
27  
28  
29  
30  
31  
32  
33  
34  
35  
36  
37  
38  
39  
40  
41  
42  
43  
44  
45  
46  
47  
48  
49  
50  
51  
52  
53  
54  
55  
56  
57  
58  
59  
60

Contrary to previous reports on post-MPS assignment in which the authors were left to speculate on possible reasons for paradoxical treatments<sup>20</sup>, we went through medical records describing rationales for the choice of treatment, well aware that it is difficult to find specific information on the reason for a clinical decision in retrospect. Careful adjustment was undertaken in order to achieve a fair comparison of subgroups. Due to a low number of revascularizations, PCI and CABG were looked at together. This may, however, be inappropriate as several studies have shown that CABG treated patients have a lower MI rate compared to PCI treated patients.

Subsets treated exceptionally, given the MPS findings, constituted a minority of our patients. Considering the small number of **Revasc** patients compared to **Med** patients it was not equitable to estimate a propensity score. However, results from Cox models adjusted for individual covariates are comparable to results from propensity score-adjusted Cox models<sup>41</sup>. Adjustment for different predictors of revascularization did not change our results; specifically, differences persisted after adjustment for angina score, one of the most important predictors of revascularization. In addition, results of the matching approach were comparable to those from Cox modelling, i.e., effects observed in univariate analyses did not vanish. An indicator of an even distribution of non-cardiac health problems affecting prognosis as well as treatment decision was the fact that in none of the subgroups of our patients did we observe a significant difference between the CD/ACD ratios.

In analyzing outcome, we focused on hard events. Just like observational studies have indicated that at least 10% of the left ventricular myocardium should be ischaemic in order for the patient to gain a survival benefit<sup>42-44</sup>, the same amount seems to be a prerequisite of an improvement in symptoms and exercise capacity<sup>45 46</sup>. Hence, revascularization is unlikely to benefit stable CAD patients unless there is objective evidence of ischaemia.

## CONCLUSIONS

In our consecutive series of patients undergoing MPS for stable angina pectoris in the clinical routine, 2% of those with normal MPS and 5% of those with fixed perfusion defects underwent revascularization against the guidelines. With normal MPS, **Revasc** was associated with significantly more cardiac events and shorter survival than **Med**, even after adjustment for clinical, angiographic, and scintigraphic variables. With fixed defects, there were no significant differences. Thus, our findings could not justify deviations from the rule to avoid coronary revascularization in the absence of myocardial ischemia in stable angina pectoris patients.

## ACKNOWLEDGMENTS

Thanks to Statistician Sonja Wehberg for assistance with computations.

## COMPETING INTERESTS

The authors declare that they have no conflict of interest.

## FUNDING

This work was part of a PhD project. The first author received a PhD scholarship from The PhD Research Fund at Odense University Hospital, Odense, Denmark.

## DATA SHARING STATEMENT

There are no unpublished data from this study.

## CONTRIBUTORSHIP STATEMENT

There are ten authors. The corresponding author is Jane Angel Simonsen.

Poul Flemming Hoilund-Carlsen, Jane Angel Simonsen, Allan Johansen, Oke Gerke, Anders Thomassen, Søren Hess, Hans Mickley, and Werner Vach contributed to the conception and design. Jane Angel Simonsen, Werner Vach, Oke Gerke, Poul Flemming Hoilund-Carlsen, Lisette Okkels Jensen, and Jesper Hallas were involved in data analysis. All authors were actively involved in collecting and interpreting data, in drafting or revising of the manuscript, and all read and approved the final manuscript submitted. Professor Werner Vach was the driving force in applying the statistical analyses as Professor Poul Flemming Hoilund-Carlsen was in most aspects of nuclear cardiologic imaging. Therefore, we propose that these two share the last authorship.

1  
2  
3  
4  
5  
6  
7  
8  
9  
10  
11  
12  
13  
14  
15  
16  
17  
18  
19  
20  
21  
22  
23  
24  
25  
26  
27  
28  
29  
30  
31  
32  
33  
34  
35  
36  
37  
38  
39  
40  
41  
42  
43  
44  
45  
46  
47  
48  
49  
50  
51  
52  
53  
54  
55  
56  
57  
58  
59  
60  
**REFERENCE LIST**

1. Montalescot G, Sechtem U, Achenbach S, *et al.* 2013 ESC guidelines on the management of stable coronary artery disease: the Task Force on the management of stable coronary artery disease of the European Society of Cardiology. *Eur Heart J* 2013;**34**:2949-3003. doi: 10.1093/eurheartj/ehs296 [published Online First: 2013/09/03]
2. Fihn SD, Gardin JM, Abrams J, *et al.* 2012 ACCF/AHA/ACP/AATS/PCNA/SCAI/STS guideline for the diagnosis and management of patients with stable ischemic heart disease: a report of the American College of Cardiology Foundation/American Heart Association task force on practice guidelines, and the American College of Physicians, American Association for Thoracic Surgery, Preventive Cardiovascular Nurses Association, Society for Cardiovascular Angiography and Interventions, and Society of Thoracic Surgeons. *Circulation* 2012;**126**:e354-e471.
3. Bourque JM, Beller GA. Stress myocardial perfusion imaging for assessing prognosis: an update. *JACC Cardiovasc Imaging* 2011;**4**:1305-19.
4. Cremer P, Hachamovitch R, Tamarappoo B. Clinical decision making with myocardial perfusion imaging in patients with known or suspected coronary artery disease. *Semin Nucl Med* 2014;**44**:320-29.
5. Hachamovitch R. Does ischemia burden in stable coronary artery disease effectively identify revascularization candidates? Ischemia burden in stable coronary artery disease effectively identifies revascularization candidates. *Circ Cardiovasc Imaging* 2015;**8**:discussion p 8. doi: 10.1161/circimaging.113.000352 [published Online First: 2015/05/16]
6. Pursnani S, Korley F, Gopaul R, *et al.* Percutaneous coronary intervention versus optimal medical therapy in stable coronary artery disease: a systematic review and meta-analysis of randomized clinical trials. *Circ Cardiovasc Interv* 2012;**5**:476-90.
7. Phillips LM, Hachamovitch R, Berman DS, *et al.* Lessons learned from MPI and physiologic testing in randomized trials of stable ischemic heart disease: COURAGE, BARI 2D, FAME, and ISCHEMIA. *J Nucl Cardiol* 2013;**20**:969-75.
8. Songco AV, Brener SJ. Initial strategy of revascularization versus optimal medical therapy for improving outcomes in ischemic heart disease: a review of the literature. *Curr Cardiol Rep* 2012;**14**:397-407.
9. Iwasaki K. Myocardial ischemia is a key factor in the management of stable coronary artery disease. *World J Cardiol* 2014;**6**:130-9. doi: 10.4330/wjc.v6.i4.130 [published Online First: 2014/04/29]
10. Simonsen JA, Johansen A, Gerke O, *et al.* Outcome with invasive versus medical treatment of stable coronary artery disease: influence of perfusion defect size, ischaemia, and ejection fraction. *EuroIntervention* 2016;**11**:1118-24. doi: 10.4244/eijv11i10a226 [published Online First: 2016/02/22]



- 1  
2  
3  
4  
5  
6  
7  
8  
9  
10  
11  
12  
13  
14  
15  
16  
17  
18  
19  
20  
21  
22  
23  
24  
25  
26  
27  
28  
29  
30  
31  
32  
33  
34  
35  
36  
37  
38  
39  
40  
41  
42  
43  
44  
45  
46  
47  
48  
49  
50  
51  
52  
53  
54  
55  
56  
57  
58  
59  
60
11. Simonsen JA, Gerke O, Rask CK, *et al.* Prognosis in patients with suspected or known ischemic heart disease and normal myocardial perfusion: Long-term outcome and temporal risk variations. *J Nucl Cardiol* 2013;**20**:347-57.
  12. Hachamovitch R, Hayes SW, Friedman JD, *et al.* Is there a referral bias against catheterization of patients with reduced left ventricular ejection fraction? Influence of ejection fraction and inducible ischemia on post-single-photon emission computed tomography management of patients without a history of coronary artery disease. *J Am Coll Cardiol* 2003;**42**:1286-94.
  13. Jensen LO, Maeng M, Kaltoft A, *et al.* Stent thrombosis, myocardial infarction, and death after drug-eluting and bare-metal stent coronary interventions. *J Am Coll Cardiol* 2007;**50**:463-70.
  14. Fine JP, Gray RJ. A proportional hazards model for the subdistribution of a competing risk. *J Am Stat Assoc* 1999;**94**:496-509.
  15. Koller MT, Raatz H, Steyerberg EW, *et al.* Competing risks and the clinical community: irrelevance or ignorance? *Stat Med* 2012;**31**:1089-97. doi: 10.1002/sim.4384 [published Online First: 2011/09/29]
  16. Latouche A, Allignol A, Beyersmann J, *et al.* A competing risks analysis should report results on all cause-specific hazards and cumulative incidence functions. *J Clin Epidemiol* 2013;**66**:648-53. doi: 10.1016/j.jclinepi.2012.09.017 [published Online First: 2013/02/19]
  17. Lunt M. Stata programs developed by Mark Lunt [Available from: <http://personalpages.manchester.ac.uk/staff/Mark.Lunt/stata.html>]. Accessed 17 January 2017
  18. Gershlick AH, de BM, Chambers J, *et al.* Role of non-invasive imaging in the management of coronary artery disease: an assessment of likely change over the next 10 years. A report from the British Cardiovascular Society Working Group. *Heart* 2007;**93**:423-31.
  19. Lin GA, Dudley RA, Lucas FL, *et al.* Frequency of stress testing to document ischemia prior to elective percutaneous coronary intervention. *JAMA* 2008;**300**:1765-73.
  20. Hachamovitch R, Nutter B, Hlatky MA, *et al.* Patient management after noninvasive cardiac imaging. Results from SPARC (Study of myocardial perfusion and coronary anatomy imaging roles in coronary artery disease). *J Am Coll Cardiol* 2012;**59**:462-74.
  21. Xiu J, Chen G, Zheng H, *et al.* Comparing treatment outcomes of fractional flow reserve-guided and angiography-guided percutaneous coronary intervention in patients with multi-vessel coronary artery diseases: a systematic review and meta-analysis. *Clin Invest Med* 2016;**39**:E25-36. [published Online First: 2016/02/03]
  22. Shreibati JB, Baker LC, Hlatky MA. Association of coronary CT angiography or stress testing with subsequent utilization and spending among Medicare beneficiaries. *JAMA* 2011;**306**:2128-36.



- 1  
2  
3  
4  
5  
6  
7  
8  
9  
10  
11  
12  
13  
14  
15  
16  
17  
18  
19  
20  
21  
22  
23  
24  
25  
26  
27  
28  
29  
30  
31  
32  
33  
34  
35  
36  
37  
38  
39  
40  
41  
42  
43  
44  
45  
46  
47  
48  
49  
50  
51  
52  
53  
54  
55  
56  
57  
58  
59  
60
23. Gimelli A, Rossi G, Landi P, *et al.* Stress/Rest Myocardial Perfusion Abnormalities by Gated SPECT: Still the Best Predictor of Cardiac Events in Stable Ischemic Heart Disease. *J Nucl Med* 2009;**50**:546-53.
24. Mowatt G, Brazzelli M, Gemmell H, *et al.* Systematic review of the prognostic effectiveness of SPECT myocardial perfusion scintigraphy in patients with suspected or known coronary artery disease and following myocardial infarction. *Nucl Med Commun* 2005;**26**:217-29.
25. Hoiland-Carlsen PF, Johansen A, Christensen HW, *et al.* Potential impact of myocardial perfusion scintigraphy as gatekeeper for invasive examination and treatment in patients with stable angina pectoris: observational study without post-test referral bias. *Eur Heart J* 2006;**27**:29-34.
26. Metz LD, Beattie M, Hom R, *et al.* The prognostic value of normal exercise myocardial perfusion imaging and exercise echocardiography: a meta-analysis. *J Am Coll Cardiol* 2007;**49**:227-37.
27. Bom MJ, Manders JM, Uijlings R, *et al.* Negative predictive value of SPECT for the occurrence of MACE in a medium-sized clinic in the Netherlands. *Neth Heart J* 2014;**22**:151-7. doi: 10.1007/s12471-014-0524-1 [published Online First: 2014/02/28]
28. Supariwala A, Uretsky S, Singh P, *et al.* Synergistic effect of coronary artery disease risk factors on long-term survival in patients with normal exercise SPECT studies. *J Nucl Cardiol* 2011;**18**:207-14.
29. Schinkel AF, Boiten HJ, van der Sijde JN, *et al.* 15-Year outcome after normal exercise (99m)Tc-sestamibi myocardial perfusion imaging: What is the duration of low risk after a normal scan? *J Nucl Cardiol* 2012;**19**:901-06.
30. Elhendy A, Schinkel A, Bax JJ, *et al.* Long-term prognosis after a normal exercise stress Tc-99m sestamibi SPECT study. *J Nucl Cardiol* 2003;**10**:261-66.
31. Pavin D, Delonca J, Siegenthaler M, *et al.* Long-term (10 years) prognostic value of a normal thallium-201 myocardial exercise scintigraphy in patients with coronary artery disease documented by angiography. *Eur Heart J* 1997;**18**:69-77.
32. Corti R, Fuster V, Badimon JJ. Pathogenetic concepts of acute coronary syndromes. *J Am Coll Cardiol* 2003;**41**:7S-14S.
33. Little WC, Constantinescu M, Applegate RJ, *et al.* Can coronary angiography predict the site of a subsequent myocardial infarction in patients with mild-to-moderate coronary artery disease? *Circulation* 1988;**78**:1157-66.
34. Naqvi TZ, Hachamovitch R, Berman D, *et al.* Does the presence and site of myocardial ischemia on perfusion scintigraphy predict the occurrence and site of future myocardial infarction in patients with stable coronary artery disease? *Am J Cardiol* 1997;**79**:1521-24.

- 1  
2  
3  
4  
5  
6  
7  
8  
9  
10  
11  
12  
13  
14  
15  
16  
17  
18  
19  
20  
21  
22  
23  
24  
25  
26  
27  
28  
29  
30  
31  
32  
33  
34  
35  
36  
37  
38  
39  
40  
41  
42  
43  
44  
45  
46  
47  
48  
49  
50  
51  
52  
53  
54  
55  
56  
57  
58  
59  
60
35. Pozo E, Agudo-Quilez P, Rojas-Gonzalez A, *et al.* Noninvasive diagnosis of vulnerable coronary plaque. *World J Cardiol* 2016;**8**:520-33. doi: 10.4330/wjc.v8.i9.520 [published Online First: 2016/10/11]
36. Arbab-Zadeh A, Fuster V. The myth of the "vulnerable plaque": transitioning from a focus on individual lesions to atherosclerotic disease burden for coronary artery disease risk assessment. *J Am Coll Cardiol* 2015;**65**:846-55.
37. Berman DS, Hachamovitch R, Kiat H, *et al.* Incremental value of prognostic testing in patients with known or suspected ischemic heart disease: a basis for optimal utilization of exercise technetium-99m sestamibi myocardial perfusion single-photon emission computed tomography. *J Am Coll Cardiol* 1995;**26**:639-47.
38. Berman DS, Kang X, Hayes SW, *et al.* Adenosine myocardial perfusion single-photon emission computed tomography in women compared with men. Impact of diabetes mellitus on incremental prognostic value and effect on patient management. *J Am Coll Cardiol* 2003;**41**:1125-33.
39. Bateman TM, O'Keefe JH, Jr., Williams ME. Incremental value of myocardial perfusion scintigraphy in prognosis and outcomes of patients with coronary artery disease. *Curr Opin Cardiol* 1996;**11**:613-20.
40. Hachamovitch R, Berman DS, Kiat H, *et al.* Incremental prognostic value of adenosine stress myocardial perfusion single-photon emission computed tomography and impact on subsequent management in patients with or suspected of having myocardial ischemia. *Am J Cardiol* 1997;**80**:426-33.
41. Sturmer T, Joshi M, Glynn RJ, *et al.* A review of the application of propensity score methods yielded increasing use, advantages in specific settings, but not substantially different estimates compared with conventional multivariable methods. *J Clin Epidemiol* 2006;**59**:437-47.
42. O'Keefe JH, Jr., Bateman TM, Ligon RW, *et al.* Outcome of medical versus invasive treatment strategies for non-high-risk ischemic heart disease. *J Nucl Cardiol* 1998;**5**:28-33.
43. Moroi M, Yamashina A, Tsukamoto K, *et al.* Coronary revascularization does not decrease cardiac events in patients with stable ischemic heart disease but might do in those who showed moderate to severe ischemia. *Int J Cardiol* 2011;**158**:246-52.
44. Hachamovitch R, Rozanski A, Shaw LJ, *et al.* Impact of ischaemia and scar on the therapeutic benefit derived from myocardial revascularization vs. medical therapy among patients undergoing stress-rest myocardial perfusion scintigraphy. *Eur Heart J* 2011;**32**:1012-24.
45. Al-Housni MB, Hutchings F, Dalby M, *et al.* Does myocardial perfusion scintigraphy predict improvement in symptoms and exercise capacity following successful elective percutaneous coronary intervention? *J Nucl Cardiol* 2009;**16**:869-77.

1  
2  
3  
4  
5  
6  
7  
8  
9  
10  
11  
12  
13  
14  
15  
16  
17  
18  
19  
20  
21  
22  
23  
24  
25  
26  
27  
28  
29  
30  
31  
32  
33  
34  
35  
36  
37  
38  
39  
40  
41  
42  
43  
44  
45  
46  
47  
48  
49  
50  
51  
52  
53  
54  
55  
56  
57  
58  
59  
60

46. Johansen A, Hoiland-Carlsen PF, Christensen HW, *et al.* Use of myocardial perfusion imaging to predict the effectiveness of coronary revascularisation in patients with stable angina pectoris. *Eur J Nucl Med Mol Imaging* 2005;**32**:1363-70.

For peer review only

**LEGENDS**

**Figure 1** Cumulative incidence functions. Blue lines: **Revasc**, red lines: **Med**

- a) Patients with normal MPS
- b) Patients with fixed perfusion defects

For peer review only

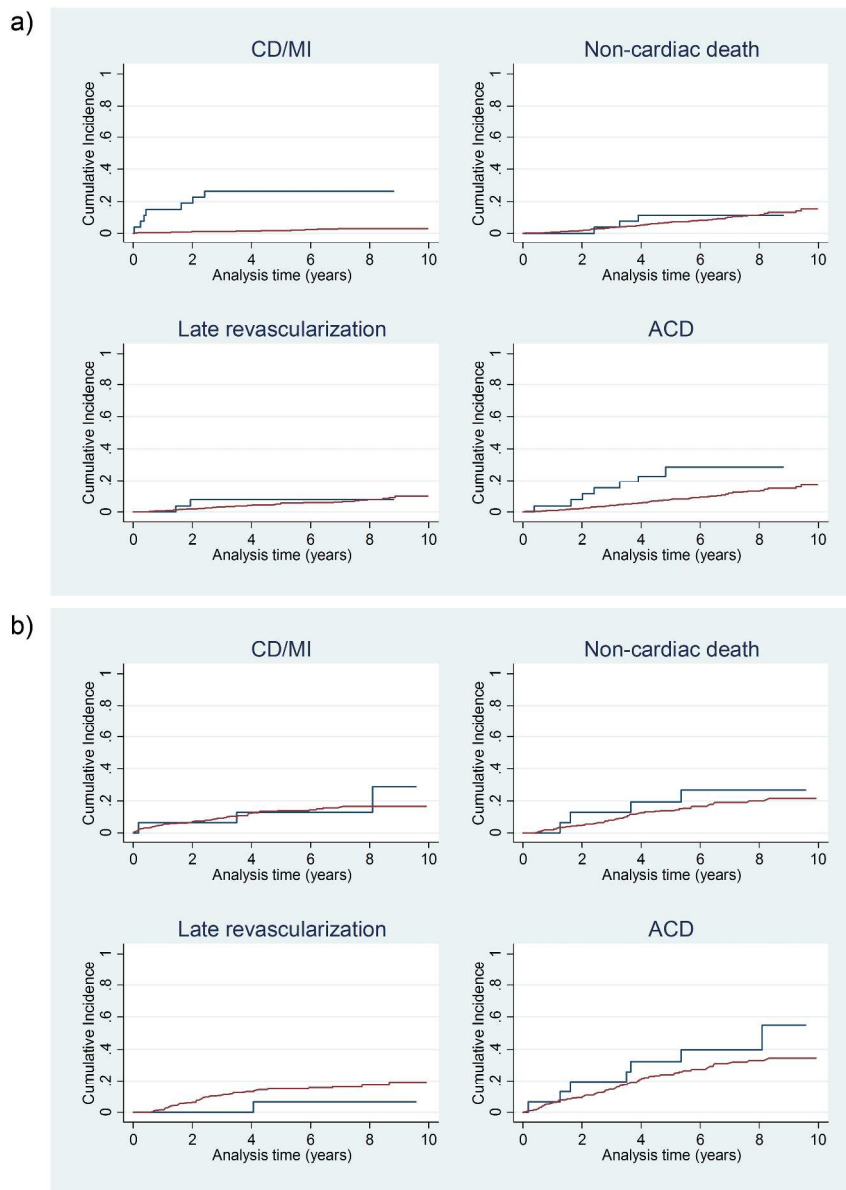

Cumulative incidence functions. Blue lines: **Revasc**, red lines: **Med**. a) Patients with normal MPS, b) Patients with fixed perfusion defects.

306x415mm (300 x 300 DPI)

## SUPPLEMENT TO THE MATCHING SECTION

For normal MPS, complete matching of **Revasc** patients with **Med** patients was obtained with respect to CAD, use of aspirin, beta blockers, and lipid lowering agents as well as dichotomized values of CCS score (1: CCS score 1-2; 2: CCS score 3-4) and number of stenotic coronary arteries (1: 0-1 vessels; 2: 2-3 vessels). Age and gender did not differ between **Revasc** patients and **Med** matches (age:  $62.1 \pm 12.2$  years versus  $61.3 \pm 10.4$  years,  $p=0.78$ ; gender: 65% versus 50% male,  $p=0.40$ ). Since among patients with known CAD, there was no inter-group difference with regard to previous MI, previous PCI, or previous CABG ( $p=0.78$ ,  $p=0.17$ , and  $p=0.53$ , respectively), we did not match according to CAD category (CAD with or without previous revascularization) and previous MI.

For fixed defects, perfect matches were obtained with regard to CAD, use of aspirin, beta blockers, lipid lowering agents, and number of arteries. Addition of CCS score always resulted in one mismatch; involving different pairs in each run, though. Again, age and gender did not differ between **Revasc** patients and **Med** matches (age:  $61.6 \pm 11.5$  years versus  $64.3 \pm 8.7$  years,  $p=0.37$ ; gender: 93% versus 73% male,  $p=0.33$ ). Using CAD category instead and including also previous MI still yielded perfect matches; however, among patients with known CAD, there was no inter-group difference pertaining to previous MI, previous PCI, or previous CABG ( $p=0.71$ ,  $p=1.00$ , and  $p=0.54$ ). Matching according to LVEF category was also feasible; yet, addition of angiographic variables then yielded three mismatches or more; hence, LVEF was not included in the final matching.

**Supplementary Table** Cause-specific hazard ratios and subdistribution hazard ratios of the **Revasc** versus **Med** difference for matched subgroups

| Normal MPS (N=52) |      |      |      |       |      |      |      | Fixed defects (N=30) |      |      |      |       |      |      |      |
|-------------------|------|------|------|-------|------|------|------|----------------------|------|------|------|-------|------|------|------|
| ACD               |      |      |      | CD/MI |      |      |      | ACD                  |      |      |      | CD/MI |      |      |      |
| CSHR              | p    | SDHR | p    | CSHR  | p    | SDHR | p    | CSHR                 | p    | SDHR | p    | CSHR  | p    | SDHR | p    |
| 7.97              | 0.05 | 7.97 | 0.06 | 4.12  | 0.08 | 4.11 | 0.07 | 1.00                 | 1.00 | 1.41 | 0.55 | 0.70  | 0.67 | 0.92 | 0.92 |

**Supplementary Figure** Cumulative incidence functions in matched groups. Blue line: **Revasc**, red line: **Med**

a) Patients with normal MPS (N=52)

b) Patients with fixed perfusion defects (N=30)

a)

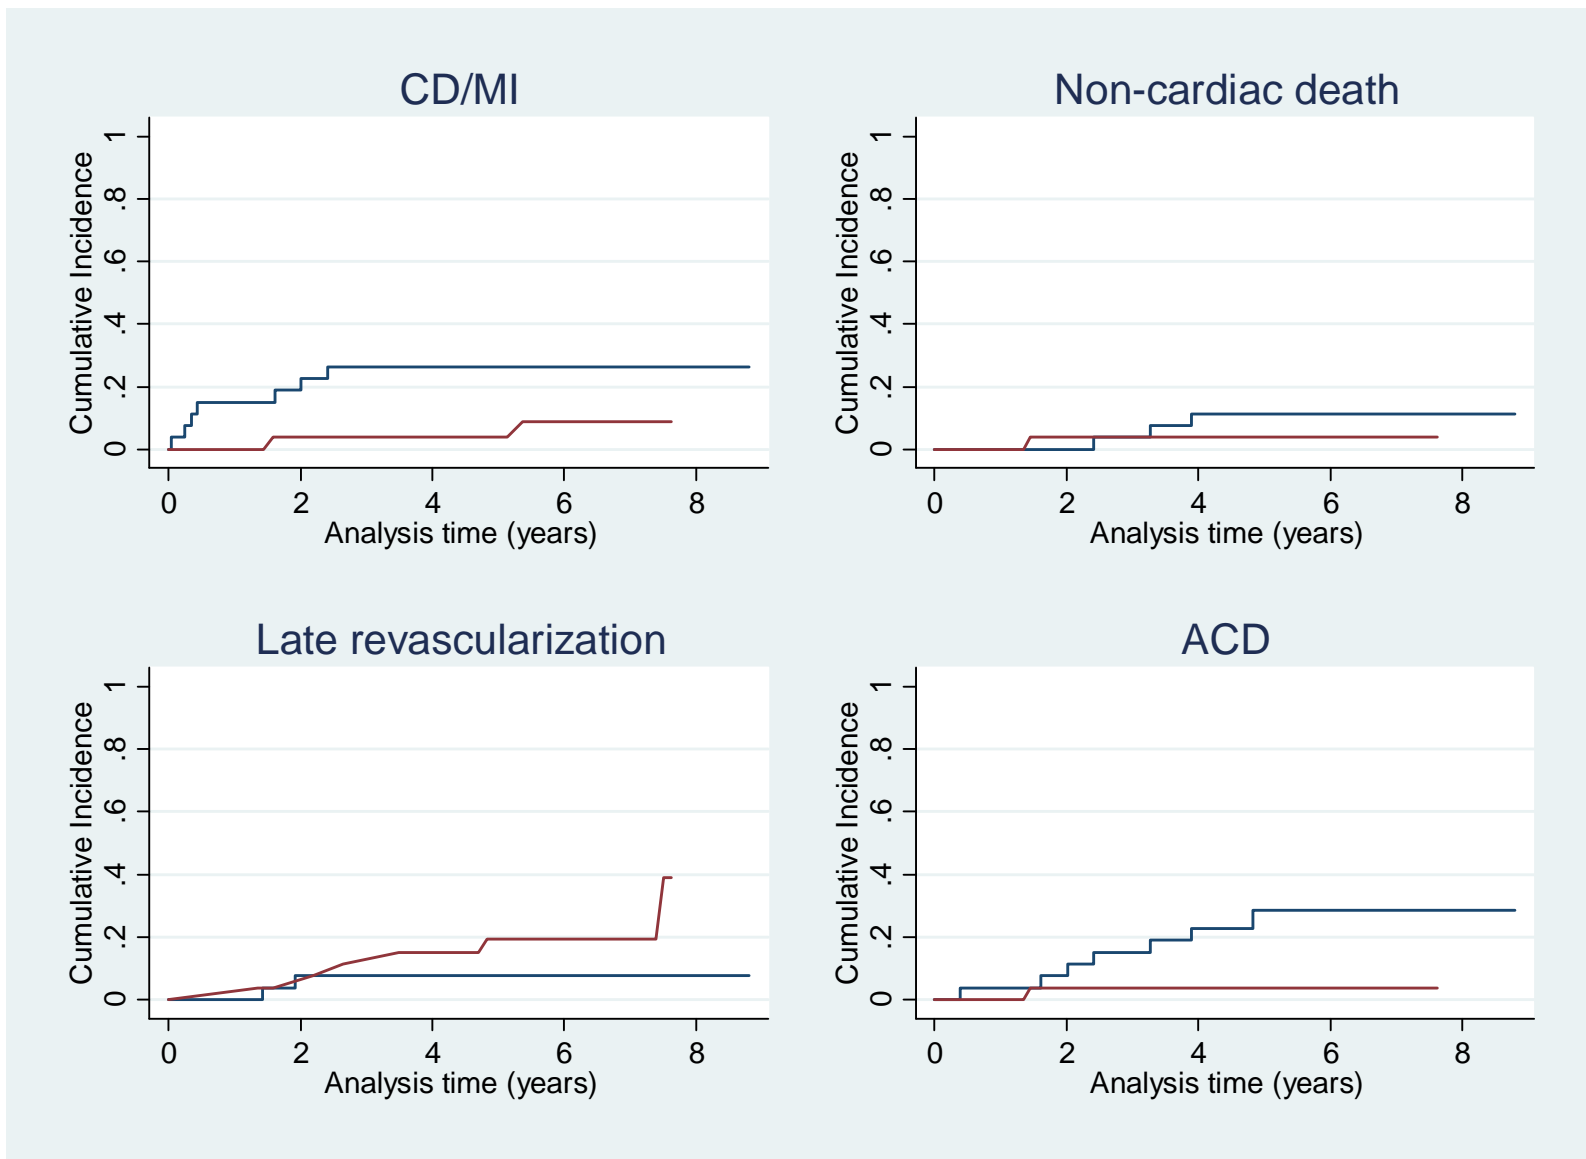



b)

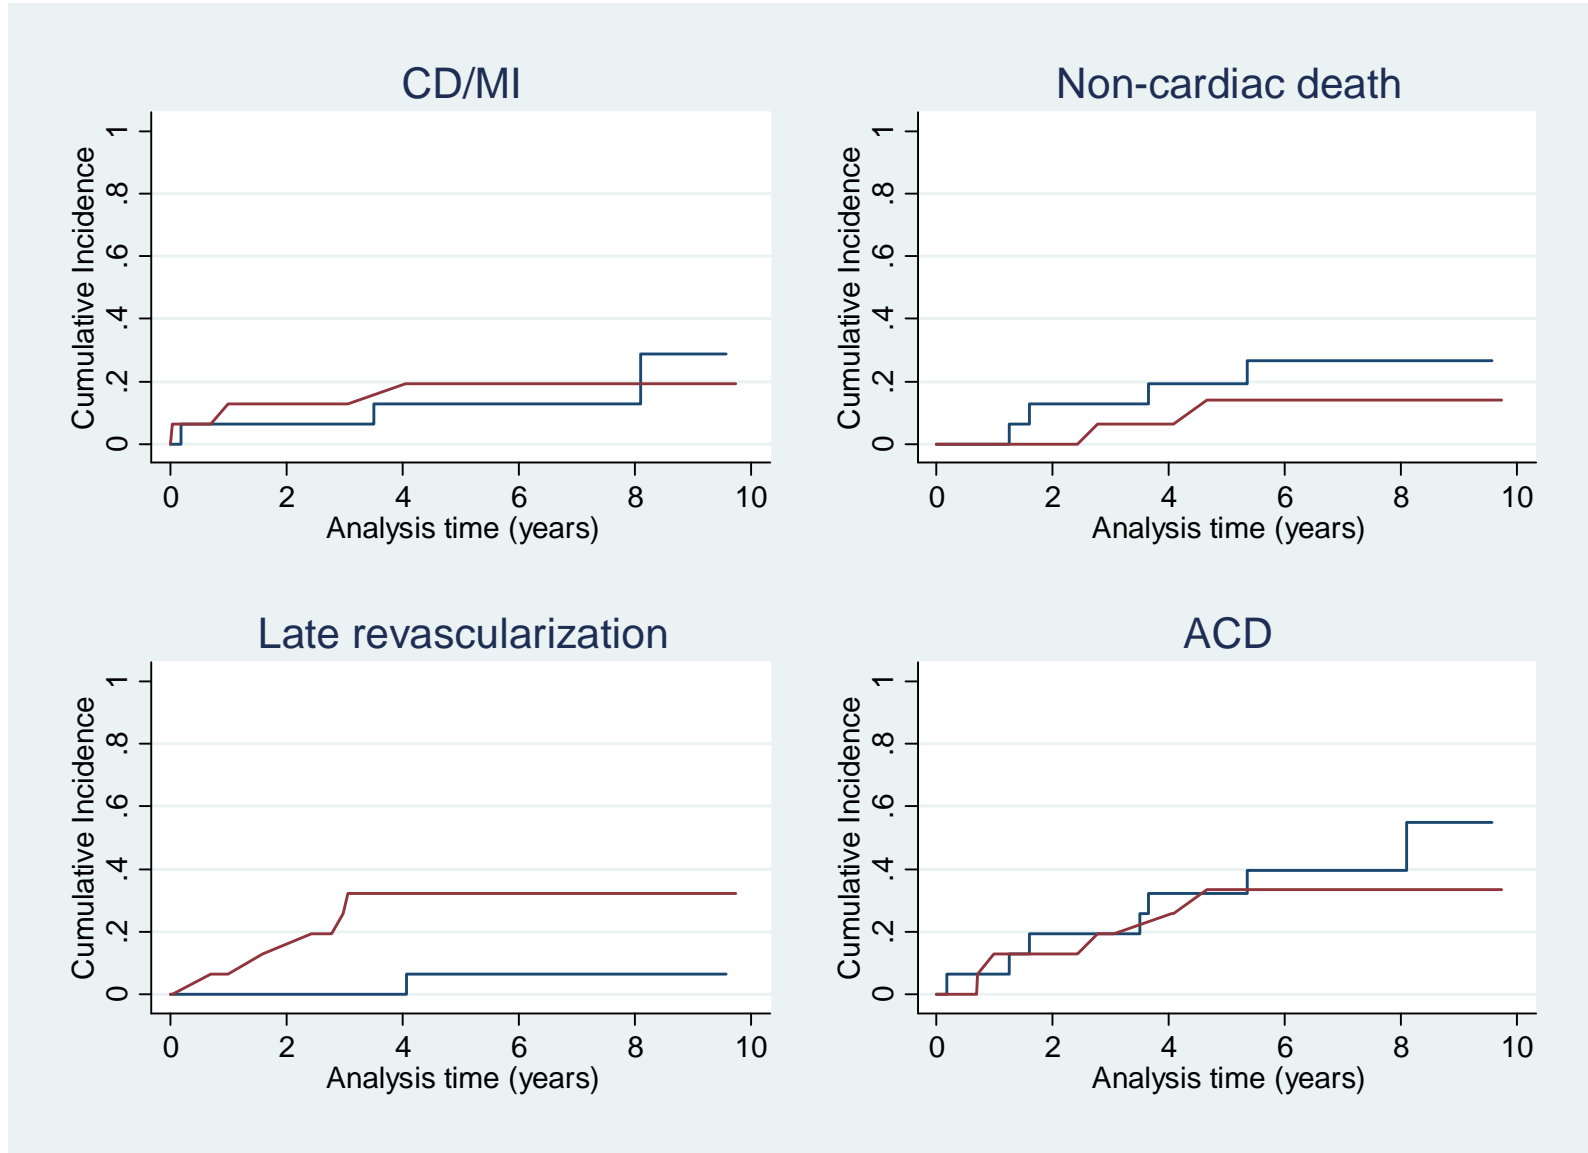

1  
2  
3  
4  
5  
6  
7  
8  
9  
10  
11  
12  
13  
14  
15  
16  
17  
18  
19  
20  
21  
22  
23  
24  
25  
26  
27  
28  
29  
30  
31  
32  
33  
34  
35  
36  
37  
38  
39  
40  
41  
42  
43  
44  
45  
46  
47

## STROBE Statement—checklist of items that should be included in reports of observational studies

|                              | Item No | Recommendation                                                                                                                                                                                                                                                                                                                                                                                                                                                                                                                                                                                                                                                                                                |
|------------------------------|---------|---------------------------------------------------------------------------------------------------------------------------------------------------------------------------------------------------------------------------------------------------------------------------------------------------------------------------------------------------------------------------------------------------------------------------------------------------------------------------------------------------------------------------------------------------------------------------------------------------------------------------------------------------------------------------------------------------------------|
| <b>Title and abstract</b>    | 1       | (a) Indicate the study's design with a commonly used term in the title or the abstract p 2<br>(b) Provide in the abstract an informative and balanced summary of what was done and what was found p 2                                                                                                                                                                                                                                                                                                                                                                                                                                                                                                         |
| <b>Introduction</b>          |         |                                                                                                                                                                                                                                                                                                                                                                                                                                                                                                                                                                                                                                                                                                               |
| Background/rationale         | 2       | Explain the scientific background and rationale for the investigation being reported p 4                                                                                                                                                                                                                                                                                                                                                                                                                                                                                                                                                                                                                      |
| Objectives                   | 3       | State specific objectives, including any prespecified hypotheses p 4                                                                                                                                                                                                                                                                                                                                                                                                                                                                                                                                                                                                                                          |
| <b>Methods</b>               |         |                                                                                                                                                                                                                                                                                                                                                                                                                                                                                                                                                                                                                                                                                                               |
| Study design                 | 4       | Present key elements of study design early in the paper p 5                                                                                                                                                                                                                                                                                                                                                                                                                                                                                                                                                                                                                                                   |
| Setting                      | 5       | Describe the setting, locations, and relevant dates, including periods of recruitment, exposure, follow-up, and data collection p 5                                                                                                                                                                                                                                                                                                                                                                                                                                                                                                                                                                           |
| Participants                 | 6       | (a) <i>Cohort study</i> —Give the eligibility criteria, and the sources and methods of selection of participants. Describe methods of follow-up pp 5-6<br><i>Case-control study</i> —Give the eligibility criteria, and the sources and methods of case ascertainment and control selection. Give the rationale for the choice of cases and controls<br><i>Cross-sectional study</i> —Give the eligibility criteria, and the sources and methods of selection of participants<br>(b) <i>Cohort study</i> —For matched studies, give matching criteria and number of exposed and unexposed (p 7)<br><i>Case-control study</i> —For matched studies, give matching criteria and the number of controls per case |
| Variables                    | 7       | Clearly define all outcomes, exposures, predictors, potential confounders, and effect modifiers. Give diagnostic criteria, if applicable pp 5-7                                                                                                                                                                                                                                                                                                                                                                                                                                                                                                                                                               |
| Data sources/<br>measurement | 8*      | For each variable of interest, give sources of data and details of methods of assessment (measurement). Describe comparability of assessment methods if there is more than one group pp 5-7                                                                                                                                                                                                                                                                                                                                                                                                                                                                                                                   |
| Bias                         | 9       | Describe any efforts to address potential sources of bias pp 5-7                                                                                                                                                                                                                                                                                                                                                                                                                                                                                                                                                                                                                                              |
| Study size                   | 10      | Explain how the study size was arrived at p 5                                                                                                                                                                                                                                                                                                                                                                                                                                                                                                                                                                                                                                                                 |
| Quantitative variables       | 11      | Explain how quantitative variables were handled in the analyses. If applicable, describe which groupings were chosen and why pp 5-7, 11-12                                                                                                                                                                                                                                                                                                                                                                                                                                                                                                                                                                    |
| Statistical methods          | 12      | (a) Describe all statistical methods, including those used to control for confounding pp 6-7<br>(b) Describe any methods used to examine subgroups and interactions pp 6-7<br>(c) Explain how missing data were addressed pp 11-12<br>(d) <i>Cohort study</i> —If applicable, explain how loss to follow-up was addressed<br><i>Case-control study</i> —If applicable, explain how matching of cases and controls was addressed<br><i>Cross-sectional study</i> —If applicable, describe analytical methods taking account of sampling strategy<br>(e) Describe any sensitivity analyses p 7                                                                                                                  |

Continued on next page

**Results**

|                  |     |                                                                                                                                                                                                                                                                                                                                                                                                                                                           |
|------------------|-----|-----------------------------------------------------------------------------------------------------------------------------------------------------------------------------------------------------------------------------------------------------------------------------------------------------------------------------------------------------------------------------------------------------------------------------------------------------------|
| Participants     | 13* | (a) Report numbers of individuals at each stage of study—eg numbers potentially eligible, examined for eligibility, confirmed eligible, included in the study, completing follow-up, and analysed <a href="#">pp 7-11</a><br>(b) Give reasons for non-participation at each stage<br>(c) Consider use of a flow diagram                                                                                                                                   |
| Descriptive data | 14* | (a) Give characteristics of study participants (eg demographic, clinical, social) and information on exposures and potential confounders <a href="#">pp 7-11</a><br>(b) Indicate number of participants with missing data for each variable of interest <a href="#">p 7-11</a><br>(c) <i>Cohort study</i> —Summarise follow-up time (eg, average and total amount)                                                                                        |
| Outcome data     | 15* | <i>Cohort study</i> —Report numbers of outcome events or summary measures over time <a href="#">p 10-11</a><br><i>Case-control study</i> —Report numbers in each exposure category, or summary measures of exposure<br><i>Cross-sectional study</i> —Report numbers of outcome events or summary measures                                                                                                                                                 |
| Main results     | 16  | (a) Give unadjusted estimates and, if applicable, confounder-adjusted estimates and their precision (eg, 95% confidence interval). Make clear which confounders were adjusted for and why they were included <a href="#">p 11-14</a><br>(b) Report category boundaries when continuous variables were categorized <a href="#">p 5</a><br>(c) If relevant, consider translating estimates of relative risk into absolute risk for a meaningful time period |
| Other analyses   | 17  | Report other analyses done—eg analyses of subgroups and interactions, and sensitivity analyses <a href="#">p 14</a>                                                                                                                                                                                                                                                                                                                                       |

**Discussion**

|                  |    |                                                                                                                                                                                                    |
|------------------|----|----------------------------------------------------------------------------------------------------------------------------------------------------------------------------------------------------|
| Key results      | 18 | Summarise key results with reference to study objectives <a href="#">p 14</a>                                                                                                                      |
| Limitations      | 19 | Discuss limitations of the study, taking into account sources of potential bias or imprecision. Discuss both direction and magnitude of any potential bias <a href="#">pp 16-17</a>                |
| Interpretation   | 20 | Give a cautious overall interpretation of results considering objectives, limitations, multiplicity of analyses, results from similar studies, and other relevant evidence <a href="#">p 14-17</a> |
| Generalisability | 21 | Discuss the generalisability (external validity) of the study results <a href="#">p 16-17</a>                                                                                                      |

**Other information**

|         |    |                                                                                                                                                                                    |
|---------|----|------------------------------------------------------------------------------------------------------------------------------------------------------------------------------------|
| Funding | 22 | Give the source of funding and the role of the funders for the present study and, if applicable, for the original study on which the present article is based <a href="#">p 18</a> |
|---------|----|------------------------------------------------------------------------------------------------------------------------------------------------------------------------------------|

\*Give information separately for cases and controls in case-control studies and, if applicable, for exposed and unexposed groups in cohort and cross-sectional studies.

**Note:** An Explanation and Elaboration article discusses each checklist item and gives methodological background and published examples of transparent reporting. The STROBE checklist is best used in conjunction with this article (freely available on the Web sites of PLoS Medicine at <http://www.plosmedicine.org/>, Annals of Internal Medicine at <http://www.annals.org/>, and Epidemiology at <http://www.epidem.com/>). Information on the STROBE Initiative is available at [www.strobe-statement.org](http://www.strobe-statement.org).
